# Supplementary material for: Ankaramite from Tenerife: a novel geothermobarometric approach to gain insights into the depth of a magma plumbing system
Source: Copernicus journal article supplement (doi:10.5194/ejm-37-747-2025), 2025-10-17
Supplement: Supplementary file 1 [file ejm-2025-4-Supplementary Figures.pdf › ejm-2025-4-Supplementary Figures.pdf]

## Supplementary figures

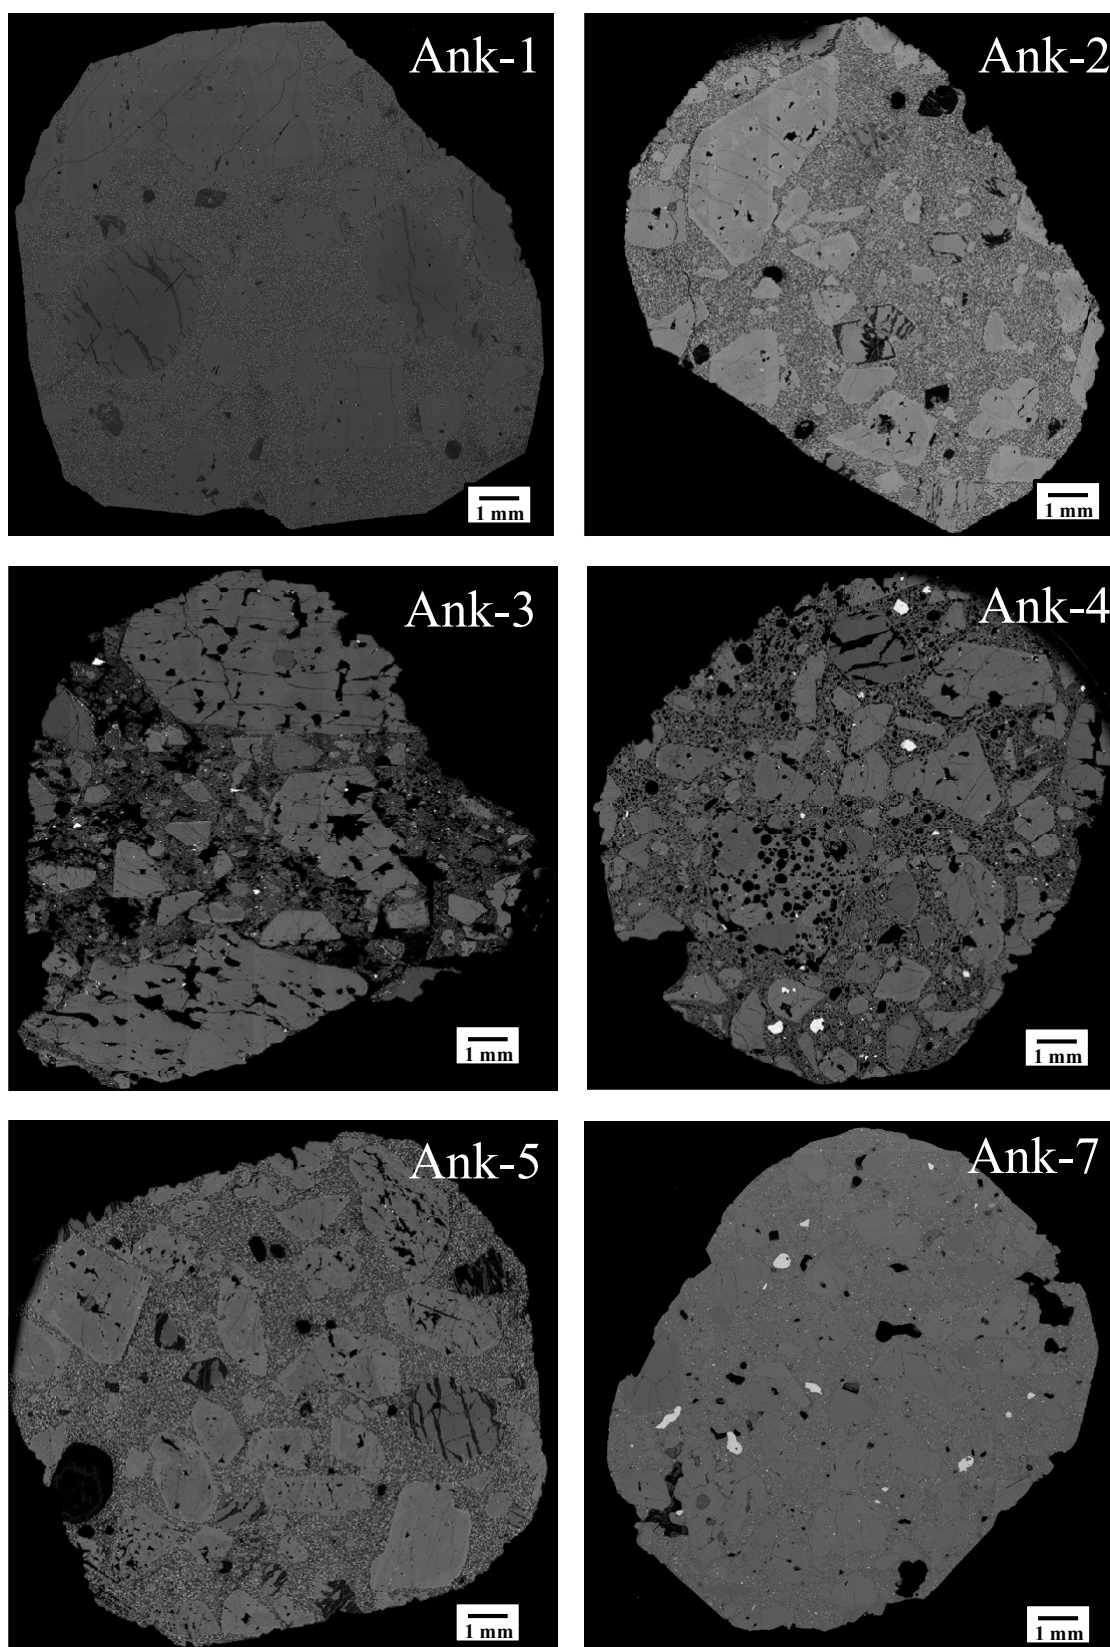

**Figure S1** - Backscattered electrons images of the studied ankaramite samples. Ank-1-5 are from Teno massif, Ank-7 is from Roque del Conde.

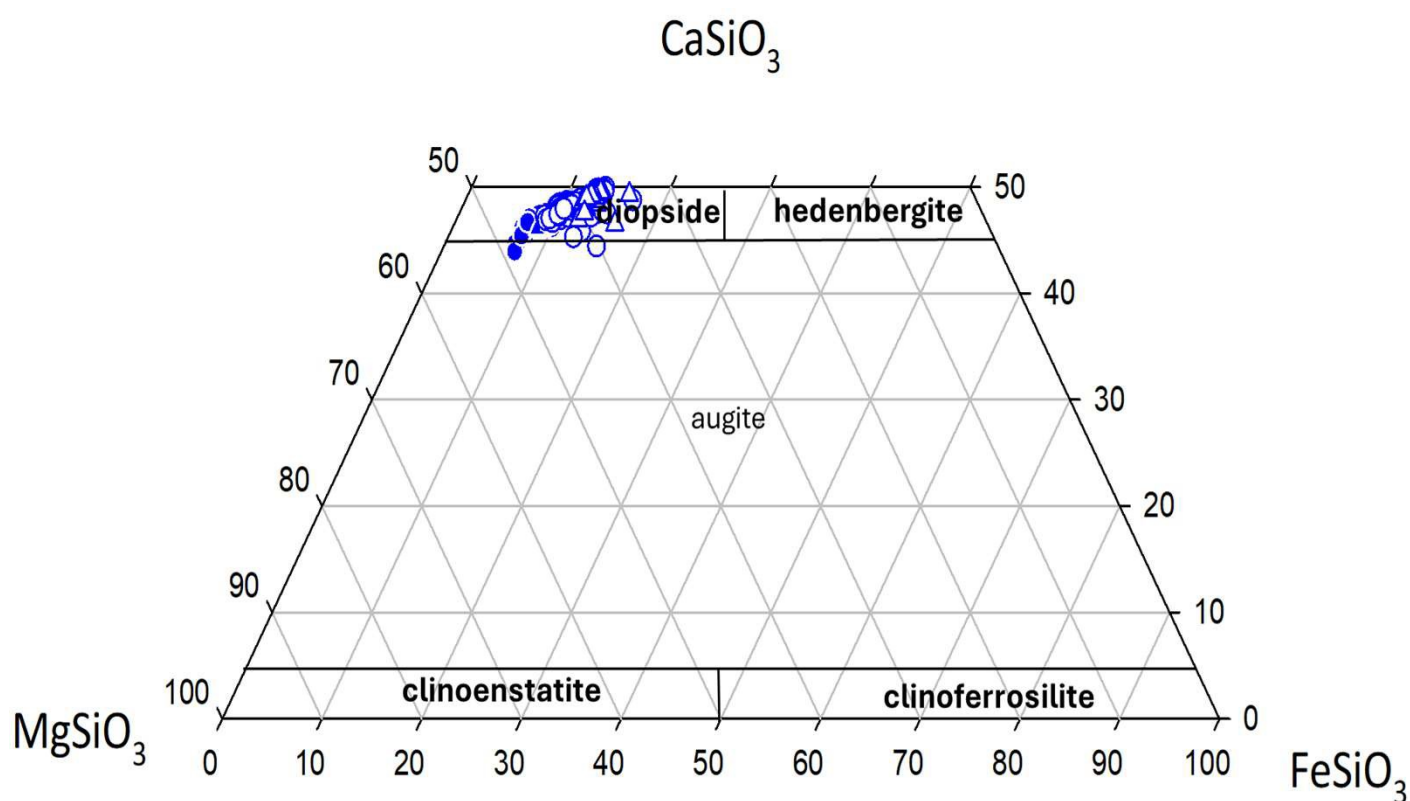

**Figure S2** - Classification diagram of the studied clinopyroxenes (Morimoto et al., 1988).

Morimoto, N. Nomenclature of Pyroxenes. *Miner. Petrol.*, 39, 55–76, <https://doi.org/10.1007/BF01226262>, 1988
