# Supplementary material for: Ankaramite from Tenerife: a novel geothermobarometric approach to gain insights into the depth of a magma plumbing system
Source: Copernicus journal article supplement (doi:10.5194/ejm-37-747-2025), 2025-10-17
Supplement: Supplementary file 1 [file ejm-2025-4-Supplementary Tables.xlsx]

## Sheet: Table S1
Table S1 - Coordinates and outcropping characteristics of the collected samples from Teno and Roque del Conde
Sample	Stratigraphic formation	Rock type	Coordinates
Ank1	Masca formation, Teno massif	Ankaramite-dike	28°18'0.98"N
			16°49'36.58"W
Ank2	Masca formation, Teno massif	Ankaramite-dike	28°18'0.98"N
			16°49'36.58"W
Ank3	Masca formation, Teno massif	Ankaramite-dike	28°18'0.98"N
			16°49'36.58"W
Ank4	Masca formation	Ankaramite-dike	28°18'0.98"N
			16°49'36.58"W
Ank5	El Palamar formation, Teno massif	Ankaramite-lava flow	28°19'15.66"N
			16°51'20.49"W
Ank7	Not identified	Ankaramite-lava flow	28° 4'18.72"N
			16°38'31.87"W

## Sheet: Table S2
Supplementary Table S2 - Chemical composition of refined clinopyroxenes analyses
	Teno										Roque del Conde
	ANK 1B CORE	ANK 1B RIM	ANK 1D CORE	ANK 1D RIM	ANK 2C CORE	ANK 3A CORE	ANK 3A RIM	ANK 3C CORE	ANK 5C RIM		ANK 7B CORE	ANK 7B RIM	ANK 7D CORE	ANK 7F CORE	ANK 7FRIM
SiO2	51.0607	47.7093	49.6703	47.734	50.5082	49.2116	45.971	48.8543	47.7782		49.7792	46.9607	46.8503	49.2637	44.048
TiO2	0.818	2.12333	1.15967	2.1675	1.2242	1.217	2.4955	1.46967	2.3264		1.229	2.38167	2.168	1.32633	3.742
Al2O3	3.58333	5.78433	3.58833	5.9105	3.793	5.262	6.6775	5.74567	5.568		5.26025	6.368	7.21	5.598	8.691
Cr2O3	1.00667	0.166333	0.479667	0.1835	0.2426	0.283	0.073	0.269333	0.0922		0.55175	0.0533333	0.188667	0.253667	0.0795
FeO	4.56596	6.39212	4.96581	6.55081	5.07364	5.75452	7.77275	6.06747	7.01695		5.45568	7.51013	7.10298	6.07894	8.45033
MnO	0.0753333	0.0753333	0.0746667	0.1	0.081	0.0918	0.1245	0.0843333	0.1074		0.0885	0.118	0.104333	0.09	0.12
MgO	16.0783	13.9197	15.345	13.887	15.778	15.2612	13.469	14.6283	13.6614		15.2297	13.179	13.2467	14.8357	11.749
CaO	21.8363	22.5947	22.6903	22.6	22.3962	21.8812	22.074	21.6393	22.209		21.7433	22.3523	22.1843	22.167	22.0865
Na2O	0.431667	0.333667	0.328333	0.333	0.3258	0.4092	0.387	0.457333	0.383		0.486	0.393667	0.490667	0.398333	0.442
K2O	-	-	-	-	-	-	-	-	-		-	-	0.0116667	0.005	0.01
Tot	99.4563	99.0988	98.3021	99.4663	99.4226	99.3715	99.0442	99.2158	99.1425		99.8234	99.3168	99.5577	100.017	99.4183
T site
Si	1.87969	1.7829	1.85717	1.77848	1.86397	1.81967	1.72721	1.81324	1.78905		1.78918	1.75939	1.79386	1.81395	1.66083
Al	0.120314	0.217103	0.142825	0.221522	0.136026	0.180331	0.272787	0.186764	0.210951		0.210822	0.240607	0.206136	0.186052	0.339167
M1 site
Ti	0.022646	0.0596733	0.0326057	0.0607361	0.0339802	0.0338425	0.0705145	0.0410187	0.0655633		0.066391	0.0671048	0.0675965	0.0367343	0.10633
Mg	0.871	0.772464	0.854333	0.730297	0.85602	0.824237	0.74636	0.793375	0.753956		0.75439	0.732055	0.748651	0.791833	0.65855
Fe3+	0.042	0.0794772	0.0721227	0.0806533	0.0554319	0.0847418	0.134933	0.065159	0.0703469		0.0758342	0.092962	0.0732171	0.0769457	0.109491
Fe2+		0.046	0.0114543	0.0848584	0.0179943		0.0232782	0.0279115	0.072233		0.0715523	0.065992	0.0814969	0.0301953	0.0757502
Cr	0.029299	0.005	0.0141892	0.00540666	0.00708052	0.00827346	0.00216618	0.00790394	0.00271755		0.00244783	0.00157996	0.0010942	0.00739264	0.00236086
Al	0.0351666	0.0376693	0.0152954	0.0380487	0.0289884	0.049002	0.0229199	0.0645721	0.0347681		0.0293146	0.0405862	0.0278071	0.0569229	0.0474863
M2 site
Mn	0.002	0.0031556	0.00236374	0.0031556	0.00253169	0.00287472	0.00396239	0.00265156	0.00340904		0.00355192	0.00374387	0.00362108	0.00280679	0.0038385
Ca	0.861257	0.902156	0.908975	0.902156	0.885538	0.866884	0.888605	0.8605	0.890997		0.889962	0.897246	0.88734	0.874491	0.892362
Na	0.0308139	0.0240584	0.0238023	0.0240584	0.0233124	0.0293336	0.0281889	0.0329087	0.0278457		0.0294124	0.0285871	0.0309831	0.0284438	0.0323484
Fe2+	0.094402	0.03	0.064	0.03	0.077	0.084	0.071	0.088	0.0695		0.07	0.066	0.072	0.0715	0.0693
Mg	0.011	0.041	0.001	0.041	0.012	0.017	0.008	0.016	0.0085		0.007	0.004	0.006	0.0225	0.0017
e- M1 XRAY	13.4	14.24	13.68	14.52	13.82	13.82	14.8	14.24	14.38		13.96	14.8	14.66	13.82	14.8
e- M1 EMPA	13.2026	14.4524	13.6817	15.03	13.4757	13.6743	14.9711	13.8719	14.71		14.49	14.96	14.8813	14.0132	15.7321
<M1-O>obs	2.07303	2.0717	2.07393	2.0709	2.07427	2.06913	2.0717	2.06807	2.0712		2.07153	2.0705	2.06603	2.0699	2.068
<M1-O>calc	2.06929	2.0663	2.07079	2.067	2.06907	2.06497	2.06353	2.06368	2.0669		2.06786	2.06592	2.06828	2.06507	2.05869
charge	11.9998	12.0016	12.0005	12.0007	11.9999	12.0004	11.9999	12	11.9998		11.9999	11.9999	11.9998	11.9998	11.9995
Mg#	0.866063	0.839539	0.852851	0.797776	0.852298	0.832925	0.76696	0.817183	0.782379		0.7779	0.765919	0.768981	0.820095	0.721749

## Sheet: Table S3
Supplementary Table S3 - Structural parameters of clinopyroxenes
	Teno										Roque del Conde
	ANK 1B CORE	ANK 1B RIM	ANK 1D CORE	ANK 1D RIM	ANK 2C CORE	ANK 3A CORE	ANK 3A RIM	ANK 3C CORE	ANK 5C RIM		ANK 7B CORE	ANK 7B RIM	ANK 7D CORE	ANK 7F CORE	ANK 7F RIM
a	9.742	9.7556	9.7496	9.7593	9.7529	9.7442	9.7603	9.7477	9.7571		9.746	9.7593	9.7523	9.7498	9.7584
b	8.904	8.9006	8.908	8.902	8.9074	8.8996	8.9006	8.8937	8.9001		8.8991	8.8986	8.8907	8.9028	8.8917
c	5.265	5.279	5.2704	5.284	5.2734	5.273	5.2861	5.2799	5.2828		5.2746	5.2872	5.287	5.27777	5.289
β	106.151	106.077	106.13	106.054	106.108	106.136	106.088	106.157	106.063		106.174	106.099	106.112	106.132	106.078
Vcell	438.675	440.452	439.713	441.172	440.131	439.257	441.232	439.651	440.844		439.363	441.157	440.402	440.07	440.987
N. obs reflection	887	900	895	853	854	919	823	725	872		704	822	762	573	775
Robs	2.57	2.35	6.38	2.62	2.64	3.92	3.06	4.37	2.54		4.43	2.86	3.64	4.61	3.21
θmax	35	35	35	35	35	35	35	35	35		35	35	35	32	35
M2 Site
M2-O2	2.323(3)	2.338(3)	2.332(3)	2.340(3)	2.331(3)	2.329(3)	2.340(3)	2.334(3)	2.340(3)		2.328(3)	2.340(3)	2.343(3)	2.330(3)	2.343(3)
M2-O1	2.358(3)	2.364(3)	2.360(3)	2.366(3)	2.362(3)	2.359(3)	2.3649(3)	2.360(3)	2.368(3)		2.357(3)	2.365(3)	2.367(3)	2.355(3)	2.367(3)
M2-O3C1	2.566(3)	2.562(3)	2.566(3)	2.563(3)	2.565(3)	2.563(3)	2.5635(3)	2.563(3)	2.562(3)		2.565(3)	2.562(3)	2.558(3)	2.572(3)	2.559(3)
M2-O3C2	2.719(3)	2.712(3)	2.721(3)	2.713(3)	2.719(3)	2.717(3)	2.7128(3)	2.716(3)	2.711(3)		2.718(3)	2.712(3)	2.710(3)	2.714(3)	2.707(3)
Mean	2.491	2.49425	2.49485	2.495	2.494	2.4917	2.49518	2.493	2.495		2.492	2.495	2.494	2.493	2.494
Vp	25.5478	25.6657	25.6646	25.6868	25.6407	25.5477	25.6934	25.6184	25.6976		25.5525	25.671	25.6679	25.5876	25.6577
Δ(M2)	0.303333	0.290667	0.301667	0.29	0.299667	0.3	0.29	0.297	0.287667		0.301333	0.289667	0.287333	0.295	0.284
M1 Site
M1-O2	2.037(3)	2.030(3)	2.039(3)	2.027(3)	2.037(3)	2.023(3)	2.03(3)	2.027(3)	2.029(3)		2.034(3)	2.027(3)	2.023(3)	2.033(3)	2.025(3)
M1-O1A1	2.126(3)	2.129(3)	2.124(3)	2.130(3)	2.129(3)	2.124(3)	2.129(3)	2.125(3)	2.129(3)		2.126(3)	2.129(3)	2.124(3)	2.125(3)	2.125(3)
M1-O1A2	2.056(3)	2.056(3)	2.059(3)	2.054(3)	2.0570(3)	2.051(3)	2.056(3)	2.052(3)	2.056(3)		2.055(3)	2.055(3)	2.051(3)	2.050(3)	2.054(3)
Mean	2.073	2.072	2.074	2.0709	2.07427	2.06913	2.072	2.06807	2.071		2.07153	2.071	2.06603	2.07	2.068
Vp	11.7835	11.7526	11.7951	11.7355	11.8004	11.7096	11.7505	11.6887	11.7437		11.7526	11.7288	11.6503	11.7175	11.6846
σ2θ(oct)	18.238	19.3966	18.6522	20.158	18.7972	19.4809	19.9959	19.9113	19.7617		18.9691	20.1405	20.6403	20.3966	20.5229
λ(oct)	1.0058	1.0062	1.0059	1.0065	1.006	1.0062	1.0064	1.0064	1.0063		1.006	1.0064	1.0066	1.0065	1.0065
T Site
T-O2	1.597(3)	1.604(3)	1.598(3)	1.608(3)	1.600(3)	1.600(3)	1.606(3)	1.605(3)	1.606(3)		1.600(3)	1.609(3)	1.609(3)	1.600(3)	1.608(3)
T-O1	1.662(3)	1.620(3)	1.513(3)	1.623(3)	1.615(3)	1.619(3)	1.623(3)	1.621(3)	1.620(3)		1.618(3)	1.624(3)	1.625(3)	1.623(3)	1.626(3)
T-O3A1	1.668(3)	1.670(3)	1.670(3)	1.673(3)	1.670(3)	1.672(3)	1.673(3)	1.669(3)	1.671(3)		1.670(3)	1.672(3)	1.672(3)	1.674(3)	1.676(3)
T-O3A2	1.686(3)	1.690(3)	1.686(3)	1.689(3)	1.689(3)	1.688(3)	1.691(3)	1.688(3)	1.691(3)		1.689(3)	1.692(3)	1.693(3)	1.693(3)	1.692(3)
T-Onbr	1.6295	1.612	1.5555	1.6155	1.6075	1.6095	1.6145	1.613	1.613		1.609	1.6165	1.617	1.6115	1.617
T-Obr	1.677	1.68	1.678	1.681	1.6795	1.68	1.682	1.6785	1.681		1.6795	1.682	1.6825	1.6835	1.684
Vp	2.2479	2.2712	2.2529	2.2796	2.2585	2.261	2.2789	2.2699	2.2751		2.2613	2.2835	2.2858	2.2747	2.2869
σ2θ(tet)	25.7405	25.2654	25.3407	25.0426	25.6543	26.1604	25.1801	24.7892	25.3117		25.3106	25.1291	25.2721	26.0136	25.9189
Mean	1.65325	1.646	1.61675	1.64825	1.6435	1.64475	1.64825	1.64575	1.647		1.64425	1.64925	1.64975	1.6475	1.6505
λ(tet)	1.006	1.0059	1.006	1.0059	1.006	1.0062	1.0059	1.0058	1.0059		1.006	1.0059	1.0059	1.0061	1.0061
O3-Si-O3	104.6(2)	104.7(2)	104.6(2)	104.8(2)	104.6(2)	104.5(2)	104.7(2)	104.9(2)	104.7(2)		104.7(2)	104.7(2)	104.7(2)	104.7(2)	104.7(2)
Si-O3-Si	136(2)	136(2)	136.1(2)	136(2)	135.9(2)	135.8(2)	136(2)	136.2(2)	136(2)		136.(2)	136(2)	135.9(2)	136(2)	135.8(2)

## Sheet: Table S4
Supplementary Table S4 - EMPA analyses of clinopyroxenes and P-T estimates using GAIA (Chicchi et al., 2023)
																						T-site				M1 & M2 sites															Classification (Morimoto 1988)					cpx components
sample	locality	notes	crystal zoning	cpx group	P (kbar)	1 sd	T (C)	1 sd	SiO2	TiO2	Al2O3	Cr2O3	Fe2O3	FeO	MnO	NiO	MgO	CaO	Na2O	K2O	sum	Si	Al	Ti	Fe3+	Mg	Fe2+	Fe3+	Al	Ti	Cr	Ni	Mn	Ca	Na	K	T	M1&M2	charge	Mg#	Fs	Wo	En	Q	J	CaTiAl2O6	CaTs	Es	CaCrTs
ANK 1-1D-8	Teno	core	oscillatory	High T	7.56323	1.01712	1141.7	29.1196	48.758	1.21	3.439	0.338	4.1722	0.844779	0.073	0	15.652	22.745	0.304	0.007	97.543	1.8365	0.152664	0.0108324	0	0.878874	0.02661	0.118256	0	0.0234399	0.0100655	0	0.00232892	0.917889	0.0222005	0.000336357	2	2	11.9997	0.858494	7.5719	47.2176	45.2105	1.82337	0.0444011	0.0234399	0	0.105784	0
ANK 1-1B-9	Teno	core	normal	High T	3.82163	0.9261	1141.72	31.0099	51.223	0.793	3.492	1.022	1.71399	2.83172	0.077	0	16.28	21.974	0.403	0.004	99.8137	1.87861	0.121388	0	0	0.890097	0.0868516	0.0473034	0.0295526	0.0218704	0.0296344	0	0.00239193	0.863455	0.0286564	0.000187149	2	2	11.9998	0.869021	7.22433	45.6831	47.0926	1.8404	0.0573128	0.0218704	0.0295526	0.0473034	0.000790911
ANK 4-4A-10	Teno	core	normal	High T	2.04408	0.492406	1158.71	11.2674	49.639	1.408	5.455	0.581	0.628064	4.88086	0.1	0	14.349	21.644	0.503	0	99.1879	1.84221	0.157791	0	0	0.793868	0.151484	0.01754	0.0808081	0.0392944	0.0170477	0	0.00314342	0.860621	0.0361933	0	2	2	12	0.824462	9.4253	47.1145	43.4602	1.80597	0.0723866	0.0392944	0.0650771	0.0141255	0
ANK 4-4A-6	Teno	core	normal	High T	2.17098	0.586806	1168.67	6.20618	48.892	1.393	5.797	0.691	1.30959	4.5086	0.08	0	14.128	21.713	0.458	0	98.9702	1.82169	0.178307	0	0	0.784745	0.140487	0.0367185	0.0762585	0.0390302	0.0203559	0	0.00252472	0.866794	0.0330862	0	2	2	12	0.815785	9.81451	47.333	42.8525	1.79203	0.0661724	0.0390302	0.0676657	0.032581	0
ANK 4-4A-7	Teno	core	normal	High T	0.845402	0.655275	1191.15	33.0231	49.468	1.489	5.766	0.587	0.201641	5.51256	0.074	0	13.996	21.776	0.44	0.005	99.3152	1.83678	0.163217	0	0	0.774726	0.171176	0.00563409	0.0891119	0.0415758	0.0172324	0	0.00232729	0.866304	0.031676	0.000236843	2	2	11.9998	0.814185	9.84181	47.5947	42.5635	1.81221	0.063352	0.0415758	0.0753044	0.00476112	0
ANK 4-4A-8	Teno	core	normal	High T	2.28358	0.387583	1166.55	12.5598	49.619	1.513	5.802	0.564	1.07699	4.7799	0.111	0	14.088	22.078	0.518	0	100.15	1.82753	0.172474	0	0	0.773527	0.147228	0.0298497	0.0793815	0.0419051	0.0164236	0	0.00346278	0.871232	0.0369904	0	2	2	12	0.813721	9.89101	47.7309	42.3781	1.79199	0.0739809	0.0419051	0.064435	0.0242294	0
ANK 4-4A-9	Teno	core	normal	High T	0.924591	0.501717	1159.86	22.0115	49.914	1.354	5.33	0.466	0.545747	5.07893	0.09	0	14.234	22.15	0.426	0.002	99.5907	1.84701	0.152989	0	0	0.785208	0.157172	0.0151967	0.0794627	0.0376771	0.0136335	0	0.00282082	0.878171	0.0305633	9.44133e-05	2	2	11.9999	0.819995	9.52858	47.7639	42.7076	1.82055	0.0611267	0.0376771	0.0651715	0.0124636	0
ANK 5-5A-9	Teno	core	resorbed	High T	3.72447	0.986377	1165.74	17.0528	50.46	1.049	3.398	0.97	2.4415	2.0231	0.088	0	16.258	22.247	0.353	0.016	99.3036	1.86196	0.138039	0	0	0.894337	0.0624304	0.0677939	0.00973797	0.0291079	0.0282989	0	0.00275038	0.879536	0.0252547	0.000753182	2	2	11.9992	0.872897	6.97354	46.1251	46.9013	1.8363	0.0505094	0.0291079	0.00973797	0.0677939	0.00229097
ANK 5-5B-7	Teno	core	resorbed	High T	4.49902	1.20887	1154.42	16.1785	51.628	0.721	3.636	1.253	0.730955	3.72827	0.101	0	16.614	20.849	0.476	0.006	99.7432	1.89051	0.109485	0	0	0.906942	0.114172	0.0201417	0.0474347	0.0198537	0.036276	0	0.00313258	0.817972	0.0337945	0.000280287	2	2	11.9997	0.871008	7.38021	43.9213	48.6985	1.83909	0.067589	0.0198537	0.0474347	0.0201417	0.00220124
ANK 4-4D-4	Teno	core	resorbed	high T	1.25787	0.488659	1154.41	32.6824	49.125	1.561	5.94	0.451	0.421343	5.46387	0.094	0	13.98	21.57	0.438	0	99.0442	1.82922	0.170781	0	0	0.776034	0.170145	0.0118062	0.0898994	0.0437097	0.0132774	0	0.00296467	0.860542	0.0316214	0	2	2	12	0.810069	10.1519	47.2438	42.6043	1.80672	0.0632429	0.0437097	0.0736848	0.00967678	0
ANK 7-7A-10	Roque del Conde	core	normal	High T	3.85924	0.625345	1153.84	8.4581	49.849	1.263	5.338	0.548	1.64478	3.717	0.111	0	14.994	21.725	0.504	0.005	99.6988	1.83646	0.163539	0	0	0.823481	0.114518	0.0455978	0.0682344	0.0349897	0.0159617	0	0.00346365	0.857519	0.0359998	0.000234991	2	2	11.9998	0.837214	8.86812	46.4886	44.6433	1.79552	0.0719996	0.0349897	0.0560821	0.037477	0
ANK 7-7A-6	Roque del Conde	core	normal	High T	3.19363	0.592472	1159.05	7.17335	49.499	1.285	5.331	0.569	2.10594	3.35903	0.073	0	15.092	21.58	0.498	0.017	99.409	1.82888	0.171123	0	0	0.831276	0.103791	0.0585525	0.0610196	0.0357029	0.0166216	0	0.00228453	0.854276	0.0356748	0.000801297	2	2	11.9992	0.836614	8.89794	46.1726	44.9295	1.78934	0.0713496	0.0357029	0.0508876	0.0488301	0
ANK 7-7A-7	Roque del Conde	core	normal	High T	3.65844	0.677525	1163.13	7.55353	49.134	1.258	5.24	0.587	2.75486	2.84813	0.09	0	14.92	21.806	0.518	0.003	99.159	1.82206	0.177941	0	0	0.824821	0.0883276	0.076876	0.0510779	0.0350811	0.0172105	0	0.00282689	0.866393	0.0372438	0.000141925	2	2	11.9999	0.833132	9.03756	46.5992	44.3632	1.77954	0.0744877	0.0350811	0.0430241	0.0647544	0
ANK 7-7A-8	Roque del Conde	core	normal	High T	3.66046	0.714943	1156.48	7.01032	49.415	1.203	5.223	0.591	1.67845	3.6247	0.089	0	14.981	21.41	0.486	0.022	98.7231	1.83776	0.162242	0	0	0.830579	0.112735	0.046973	0.066691	0.033644	0.0173776	0	0.00280353	0.853109	0.0350437	0.00104378	2	2	11.999	0.838726	8.80248	46.2089	44.9886	1.79642	0.0700874	0.033644	0.0557132	0.0392409	0
ANK 7-7A-9	Roque del Conde	core	normal	High T	2.72194	0.481806	1144.82	12.0851	49.718	1.198	5.393	0.53	1.10666	4.27321	0.079	0	14.847	21.697	0.401	0.017	99.2599	1.84062	0.159385	0	0	0.819405	0.1323	0.03083	0.0759243	0.0333517	0.0155131	0	0.00247721	0.860612	0.0287831	0.000802887	2	2	11.9992	0.83397	8.97296	46.6299	44.3972	1.81232	0.0575663	0.0333517	0.0659156	0.0267658	0
ANK 7-7B-10	Roque del Conde	core	normal	High T	2.75943	0.543745	1160.44	8.59413	49.506	1.303	5.358	0.566	2.41028	2.99819	0.084	0	15.201	21.808	0.485	0	99.7195	1.8233	0.176699	0	0	0.834609	0.0923454	0.0668004	0.0558753	0.0360875	0.0164813	0	0.00262039	0.860548	0.0346327	0	2	2	12	0.839854	8.71152	46.3427	44.9458	1.7875	0.0692654	0.0360875	0.0476078	0.0569164	0
ANK 7-7B-6	Roque del Conde	core	normal	High T	6.60291	1.18227	1168.45	10.9404	48.649	1.133	5.042	0.619	3.67643	1.74088	0.075	0	15.079	21.876	0.527	0.008	98.4253	1.8158	0.184203	0	0	0.839028	0.0543398	0.10326	0.0375936	0.0318006	0.0182666	0	0.00237105	0.874822	0.0381371	0.000380925	2	2	11.9996	0.841867	8.53713	46.6865	44.7763	1.76819	0.0762743	0.0318006	0.0321885	0.0884134	0
ANK 7-7B-7	Roque del Conde	core	normal	High T	3.29882	0.573815	1152.69	7.39937	49.971	1.261	5.321	0.561	1.98982	3.56952	0.082	0	15.197	21.664	0.514	0.002	100.132	1.83293	0.167068	0	0	0.830992	0.109495	0.0549229	0.0629597	0.0347821	0.0162692	0	0.00254758	0.851384	0.0365541	9.35868e-05	2	2	11.9999	0.834824	9.02838	46.0371	44.9345	1.79187	0.0731081	0.0347821	0.0520758	0.0454284	0
ANK 7-7B-8	Roque del Conde	core	normal	High T	3.79551	0.664116	1161.29	7.76363	49.607	1.177	5.239	0.535	2.42848	3.11681	0.121	0	15.104	21.722	0.514	0	99.5643	1.8303	0.169697	0	0	0.830774	0.0961715	0.0674258	0.058121	0.0326564	0.0156066	0	0.00378139	0.858694	0.0367695	0	2	2	12	0.835477	9.01414	46.2448	44.7411	1.78564	0.073539	0.0326564	0.0483238	0.0560601	0
ANK 7-7B-9	Roque del Conde	core	normal	High T	2.61351	0.747998	1153.34	8.79558	50.033	1.175	5.123	0.545	1.88275	3.42687	0.067	0	15.417	21.779	0.431	0.002	99.8816	1.83809	0.161912	0	0	0.844346	0.105284	0.0520491	0.0599043	0.0324608	0.01583	0	0.00208483	0.857248	0.0306995	9.37338e-05	2	2	11.9999	0.84293	8.56621	46.0635	45.3703	1.80688	0.061399	0.0324608	0.0518977	0.0450924	0
ANK 1-1A-10	Teno	core	obscillatory	Low T	4.95822	0.881745	1104.42	21.6743	49.165	1.572	4.455	0.135	1.8378	3.64132	0.074	0	14.686	22.538	0.309	0	98.4131	1.84078	0.159225	0	0	0.819708	0.114014	0.051779	0.0373608	0.0442598	0.00399625	0	0.00234673	0.904105	0.0224309	0	2	2	12	0.831767	8.88712	47.7869	43.326	1.83783	0.0448619	0.0442598	0.0296343	0.0410708	0
ANK 1-1A-12	Teno	core	obscillatory	Low T	4.70488	0.746458	1107.78	24.8695	49.638	1.361	3.915	0.183	1.60071	3.71465	0.077	0	14.887	22.532	0.296	0.003	98.2074	1.86069	0.139306	0	0	0.831914	0.116449	0.0451528	0.0336565	0.0383646	0.00542357	0	0.00244477	0.904938	0.0215128	0.000143462	2	2	11.9999	0.837344	8.62994	47.6058	43.7643	1.8533	0.0430256	0.0383646	0.0267241	0.0358525	0
ANK 1-1A-3	Teno	core	obscillatory	Low T	2.97062	0.730987	1091.99	22.367	48.744	1.741	5.014	0.159	1.65226	4.12426	0.082	0	14.418	22.263	0.305	0.002	98.5045	1.82577	0.174228	0	0	0.805084	0.12919	0.046571	0.0471167	0.0490384	0.00470865	0	0.00260151	0.893445	0.0221498	9.55678e-05	2	2	11.9999	0.820807	9.50307	47.6024	42.8945	1.82772	0.0442996	0.0490384	0.0382973	0.0378537	0
ANK 1-1A-9	Teno	core	obscillatory	Low T	5.95749	0.951201	1114.68	19.9085	49.7	1.5	4.096	0.117	1.77274	3.53786	0.063	0	14.861	22.886	0.291	0.005	98.8296	1.85207	0.14793	0	0	0.825581	0.110255	0.0497116	0.0319654	0.0420343	0.00344715	0	0.00198851	0.913754	0.0210251	0.000237699	2	2	11.9998	0.837688	8.51815	48.0597	43.4221	1.84959	0.0420502	0.0420343	0.024993	0.0388683	0
ANK 1-1B-10	Teno	core	normal	Low T	3.91949	0.900139	1129.36	32.0857	50.924	0.828	3.497	0.974	1.87906	2.73019	0.063	0	16.065	21.952	0.449	0	99.3612	1.87689	0.123107	0	0	0.88269	0.0841523	0.0521156	0.0287973	0.0229488	0.0283824	0	0.00196672	0.866861	0.0320854	0	2	2	12	0.866267	7.32258	45.9195	46.758	1.8337	0.0641708	0.0229488	0.0274794	0.0497305	0
ANK 1-1B-11	Teno	core	normal	Low T	4.42001	1.01537	1110.69	31.5959	51.035	0.833	3.761	1.024	0.90764	3.63529	0.086	0	15.89	21.583	0.443	0.007	99.2049	1.88355	0.116446	0	0	0.874268	0.112203	0.0252078	0.0471498	0.0231189	0.0298802	0	0.0026884	0.853454	0.0316999	0.000329583	2	2	11.9997	0.864175	7.50068	45.6925	46.8068	1.83993	0.0633998	0.0231189	0.0457493	0.024459	0
ANK 1-1B-8	Teno	core	normal	Low T	3.59191	0.814342	1084.92	29.7976	50.804	0.893	3.55	1.016	1.18468	3.122	0.073	0	15.96	22.022	0.365	0	98.9897	1.8795	0.120495	0	0	0.880216	0.0965907	0.0329805	0.0342913	0.0248433	0.0297176	0	0.00228746	0.872893	0.0261808	0	2	2	12	0.871685	6.99528	46.3081	46.6966	1.8497	0.0523616	0.0248433	0.0342913	0.0329805	0.00353677
ANK 1-1C-5	Teno	core	patchy-obscillatory	Low T	5.5355	0.826259	1114.83	23.3818	49.483	1.481	3.907	0.155	1.85114	3.37431	0.107	0	15.007	22.561	0.292	0.003	98.2215	1.85427	0.145726	0	0	0.838344	0.105745	0.0521998	0.0268258	0.0417335	0.00459223	0	0.00339616	0.905805	0.0212151	0.000143415	2	2	11.9999	0.841467	8.46715	47.5366	43.9963	1.84989	0.0424302	0.0417335	0.0211343	0.0411249	0
ANK 1-1C-6	Teno	core	patchy-obscillatory	Low T	3.91019	0.586001	1098.5	12.6061	49.819	1.361	4.159	0.232	2.74265	2.60911	0.063	0	15.161	22.949	0.359	0.01	99.4648	1.84301	0.156987	0	0	0.836126	0.0807202	0.0763511	0.0243479	0.037862	0.00678571	0	0.00197406	0.909611	0.0257497	0.000471943	2	2	11.9995	0.841853	8.34979	47.7541	43.8962	1.82646	0.0514994	0.037862	0.0196485	0.0616145	0
ANK 1-1C-7	Teno	core	patchy-obscillatory	Low T	4.70106	0.766625	1095.01	19.9273	49.967	1.326	3.935	0.232	1.78928	3.32397	0.055	0	15.168	22.851	0.263	0.009	98.9193	1.85795	0.14205	0	0	0.840794	0.103363	0.0500657	0.0303968	0.0370772	0.00682044	0	0.00173221	0.910363	0.0189605	0.000426923	2	2	11.9996	0.84568	8.13929	47.755	44.1057	1.85452	0.0379211	0.0370772	0.0256493	0.0422462	0
ANK 1-1C-8	Teno	core	patchy-obscillatory	Low T	3.75387	0.559001	1089.5	14.8177	49.777	1.362	4.068	0.253	2.38512	2.98583	0.091	0	15.146	22.549	0.374	0.015	99.0059	1.84963	0.15037	0	0	0.839006	0.0927848	0.0666926	0.0277843	0.0380579	0.00743277	0	0.00286407	0.897722	0.0269446	0.000711056	2	2	11.9993	0.84028	8.54847	47.2717	44.1798	1.82951	0.0538892	0.0380579	0.0218371	0.0524169	0
ANK 1-1D-10	Teno	core	obscillatory	Low T	3.90604	0.616693	1128.8	12.6172	49.474	1.154	3.49	0.648	2.59879	2.37956	0.059	0	15.335	22.551	0.324	0.009	98.0224	1.856	0.144002	0	0	0.85762	0.074654	0.0733641	0.0103049	0.0325551	0.0192198	0	0.00187473	0.90641	0.0235662	0.000430724	2	2	11.9996	0.852812	7.8317	47.3588	44.8095	1.83868	0.0471324	0.0325551	0.0097165	0.0691753	0
ANK 1-1D-6	Teno	core	obscillatory	Low T	4.92717	0.782689	1090.41	17.6445	48.259	1.49	4.158	0.142	4.03656	1.61083	0.072	0	14.92	22.874	0.315	0	97.8774	1.81769	0.18231	0	0	0.837763	0.0507397	0.11441	0.00226991	0.0422027	0.00422867	0	0.00229699	0.923086	0.0230036	0	2	2	12	0.83533	8.68366	47.8706	43.4458	1.81159	0.0460072	0.0422027	0.00190466	0.0960002	0
ANK 1-1D-7	Teno	core	obscillatory	Low T	4.46844	0.582682	1122.34	20.9458	49.591	1.203	3.67	0.297	3.00127	2.1134	0.092	0	15.355	22.935	0.306	0	98.5637	1.85012	0.149877	0	0	0.854001	0.0659381	0.0842584	0.0114925	0.0337501	0.00876048	0	0.00290718	0.916759	0.0221342	0	2	2	12	0.850431	7.95814	47.652	44.3899	1.8367	0.0442683	0.0337501	0.00988731	0.0724899	0
ANK 1-1D-9	Teno	core	obscillatory	Low T	3.78617	0.554863	1107.54	17.9819	49.946	1.122	3.605	0.494	2.09022	2.71418	0.073	0	15.345	22.585	0.355	0.003	98.3324	1.8654	0.134596	0	0	0.854377	0.0847749	0.0587456	0.0240889	0.0315121	0.0145872	0	0.0023093	0.903755	0.0257066	0.000142939	2	2	11.9999	0.856177	7.65928	47.4671	44.8736	1.84291	0.0514132	0.0315121	0.0208137	0.0507584	0
ANK 2-2A-1	Teno	core	resorbed	Low T	2.34095	0.479267	1064.05	13.3565	50.614	1.067	3.32	0.451	1.8386	2.95759	0.09	0	16.222	21.932	0.303	0.004	98.7992	1.87645	0.123552	0	0	0.896563	0.0916981	0.0512938	0.0215134	0.0297469	0.0132195	0	0.00282615	0.87117	0.0217797	0.000189183	2	2	11.9998	0.862449	7.62029	45.5263	46.8534	1.85943	0.0435595	0.0297469	0.0189281	0.0451297	0
ANK 2-2A-2	Teno	core	resorbed	Low T	4.39249	0.602286	1101.46	27.0008	50.242	1.008	3.388	0.585	2.27411	2.22071	0.079	0	15.981	22.336	0.336	0.007	98.4568	1.86936	0.130643	0	0	0.886421	0.0690993	0.063672	0.0179262	0.0282032	0.017209	0	0.00248965	0.890409	0.0242387	0.000332261	2	2	11.9997	0.869729	7.07398	46.5673	46.3587	1.84593	0.0484774	0.0282032	0.0163089	0.0579274	0
ANK 2-2A-3	Teno	core	resorbed	Low T	3.28003	0.561768	1076.42	22.6027	51.16	1.014	3.217	0.452	1.94964	2.62668	0.079	0	16.328	22.46	0.32	0.005	99.6113	1.88029	0.119709	0	0	0.894619	0.0807342	0.0539213	0.0196405	0.0280249	0.0131343	0	0.00245928	0.884429	0.0228028	0.000234434	2	2	11.9998	0.869174	7.15569	46.1562	46.6881	1.85978	0.0456057	0.0280249	0.0169965	0.0466624	0
ANK 2-2A-4	Teno	core	resorbed	Low T	2.77749	0.713396	1093.15	25.3199	50.713	1.117	3.211	0.325	2.32613	2.50891	0.081	0	16.324	22.305	0.296	0.002	99.209	1.87269	0.127312	0	0	0.898635	0.0774796	0.0646384	0.012436	0.0310178	0.00948863	0	0.00253348	0.882484	0.0211925	9.42177e-05	2	2	11.9999	0.863447	7.51135	45.825	46.6637	1.8586	0.042385	0.0310178	0.0105324	0.0547439	0
ANK 2-2A-5	Teno	core	resorbed	Low T	3.57532	0.604829	1068.53	22.6485	50.958	0.991	3.261	0.503	1.94748	2.55262	0.07	0	16.278	22.356	0.33	0.004	99.2511	1.87919	0.120811	0	0	0.89489	0.0787228	0.0540434	0.0209213	0.0274817	0.0146656	0	0.00218646	0.883305	0.0235948	0.00018818	2	2	11.9998	0.870807	7.05396	46.1702	46.7758	1.85692	0.0471896	0.0274817	0.0183768	0.0474705	0
ANK 2-2B-2	Teno	core	patchy	Low T	1.90452	0.49144	1069.42	14.403	50.03	1.235	3.962	0.298	2.27976	2.85663	0.091	0	15.784	22.162	0.314	0	99.0124	1.85418	0.145823	0	0	0.872064	0.0885383	0.06358	0.0272359	0.0344191	0.00873194	0	0.00285659	0.880011	0.0225629	0	2	2	12	0.851473	8.12642	46.1452	45.7284	1.84061	0.0451258	0.0344191	0.0230879	0.0538969	0
ANK 2-2B-3	Teno	core	patchy	Low T	3.55992	0.494816	1090.5	15.8844	51.045	1.106	3.399	0.246	1.58862	3.15753	0.073	0	16.106	22.471	0.276	0.007	99.4752	1.88002	0.119981	0	0	0.884316	0.0972552	0.0440292	0.0275622	0.0306321	0.00716338	0	0.00227729	0.886727	0.0197089	0.0003289	2	2	11.9997	0.862242	7.49824	46.3139	46.1879	1.8683	0.0394178	0.0306321	0.0226056	0.0361113	0
ANK 2-2B-4	Teno	core	patchy	Low T	2.01078	0.473836	1062.79	18.6795	50.476	1.155	3.722	0.326	1.97982	2.92052	0.073	0	16.135	21.978	0.311	0.013	99.0893	1.86596	0.134039	0	0	0.889195	0.090289	0.0550749	0.0281242	0.0321079	0.00952816	0	0.00228574	0.870491	0.0222906	0.00061308	2	2	11.9994	0.859492	7.74114	45.6391	46.6198	1.84998	0.0445812	0.0321079	0.0236028	0.0462207	0
ANK 2-2B-5	Teno	core	patchy	Low T	3.4975	0.487514	1087.92	15.7577	50.389	1.213	3.646	0.241	2.12991	2.88247	0.058	0	15.745	22.512	0.315	0.011	99.1424	1.86509	0.134915	0	0	0.868793	0.0892245	0.0593246	0.0241372	0.0337626	0.00705267	0	0.00181835	0.892762	0.0226057	0.000519412	2	2	11.9995	0.853983	7.86472	46.6945	45.4408	1.85078	0.0452114	0.0337626	0.0194891	0.0479003	0
ANK 2-2C-1	Teno	core	resorbed	Low T	3.30344	0.536663	1082.65	15.508	50.292	1.272	3.749	0.221	2.22524	2.93869	0.09	0	15.68	22.485	0.322	0	99.2749	1.86025	0.139753	0	0	0.864626	0.0909037	0.0619384	0.0236822	0.0353811	0.00646305	0	0.00281968	0.891093	0.0230925	0	2	2	12	0.849782	8.14394	46.6204	45.2357	1.84662	0.0461851	0.0353811	0.0190826	0.0499085	0
ANK 2-2C-2	Teno	core	resorbed	Low T	3.21832	0.447276	1084.32	17.3721	50.87	1.162	3.547	0.237	1.65313	3.33848	0.099	0	15.922	22.371	0.3	0	99.4996	1.87508	0.124915	0	0	0.874918	0.102912	0.0458541	0.0291764	0.032209	0.00690687	0	0.00309087	0.883493	0.02144	0	2	2	12	0.854676	7.94949	46.2497	45.8008	1.86132	0.04288	0.032209	0.023525	0.0369723	0
ANK 2-2C-3	Teno	core	resorbed	Low T	3.09051	0.460143	1080.9	15.6432	50.659	1.143	3.588	0.255	2.19226	2.79836	0.07	0	15.954	22.503	0.312	0.006	99.4806	1.86754	0.132465	0	0	0.876784	0.0862724	0.0608158	0.0234269	0.0316862	0.00743235	0	0.00218573	0.888815	0.0223003	0.000282176	2	2	11.9997	0.856341	7.7955	46.4164	45.7881	1.85187	0.0446006	0.0316862	0.0192138	0.0498787	0
ANK 2-2C-4	Teno	core	resorbed	Low T	3.44206	0.50348	1086.24	23.0464	50.734	1.162	3.532	0.199	2.56557	2.40345	0.08	0	16.018	22.678	0.349	0	99.721	1.8654	0.134602	0	0	0.877994	0.0739034	0.0709851	0.0184545	0.0321285	0.00578495	0	0.00249143	0.893379	0.0248795	0	2	2	12	0.858353	7.68103	46.5604	45.7586	1.84528	0.049759	0.0321285	0.0145147	0.0558304	0
ANK 2-2C-5	Teno	core	resorbed	Low T	2.57711	0.494168	1076.66	16.5164	49.986	1.382	4.549	0.301	1.34767	3.90534	0.066	0	15.316	21.944	0.346	0.007	99.15	1.8516	0.148396	0	0	0.845777	0.12098	0.037566	0.0502021	0.0384964	0.00881536	0	0.00207076	0.870912	0.0248496	0.000330791	2	2	11.9997	0.842136	8.55573	46.3916	45.0527	1.83767	0.0496993	0.0384964	0.0408415	0.0305616	0
ANK 2-2D-1	Teno	core	patchy-obscillatory	Low T	3.17239	0.652136	1063.06	19.8322	50.952	0.93	3.423	0.618	1.95679	2.67524	0.073	0	16.362	22.029	0.341	0.014	99.374	1.87636	0.123645	0	0	0.898258	0.0823897	0.0542263	0.0249215	0.0257542	0.0179935	0	0.002277	0.869175	0.0243474	0.000657716	2	2	11.9993	0.867988	7.2859	45.5943	47.1198	1.84982	0.0486948	0.0257542	0.0227137	0.0494224	0
ANK 2-2D-2	Teno	core	patchy-obscillatory	Low T	3.35488	0.589861	1081.36	21.9719	50.64	0.975	3.405	0.587	2.20955	2.49281	0.087	0	16.321	21.989	0.335	0.01	99.0514	1.87167	0.128326	0	0	0.899278	0.0770516	0.0614542	0.0199984	0.027099	0.0171533	0	0.00272359	0.870764	0.0240063	0.000471512	2	2	11.9995	0.866537	7.38929	45.5594	47.0513	1.84709	0.0480126	0.027099	0.0182001	0.055928	0
ANK 2-2D-3	Teno	core	patchy-obscillatory	Low T	4.08653	0.60361	1103.3	28.7267	50.55	0.964	3.478	0.632	2.42123	2.21334	0.079	0	16.25	22.065	0.376	0.013	99.0416	1.86833	0.13167	0	0	0.895357	0.0684126	0.0673409	0.0198325	0.026793	0.0184681	0	0.00247312	0.873765	0.0269441	0.00061296	2	2	11.9994	0.868343	7.24705	45.8105	46.9425	1.83754	0.0538883	0.026793	0.0177647	0.0603197	0
ANK 2-2D-4	Teno	core	patchy-obscillatory	Low T	3.76584	0.601859	1047.41	14.6448	51.059	0.944	3.458	0.591	1.66969	2.84058	0.077	0	16.325	21.953	0.37	0.014	99.3013	1.8806	0.119404	0	0	0.896369	0.0874957	0.0462775	0.0307046	0.0261461	0.0172101	0	0.00240215	0.866314	0.0264222	0.000657821	2	2	11.9993	0.870141	7.17143	45.6229	47.2057	1.85018	0.0528444	0.0261461	0.026768	0.0403443	0
ANK 2-2D-5	Teno	core	patchy-obscillatory	Low T	3.44856	0.553922	1057.16	18.2068	51.036	0.943	3.354	0.618	1.87052	2.66887	0.073	0	16.369	22.127	0.346	0	99.4054	1.87859	0.121407	0	0	0.898233	0.0821562	0.0518119	0.0240981	0.0261024	0.0179853	0	0.00227596	0.872644	0.0246931	0	2	2	12	0.870211	7.14396	45.7571	47.0989	1.85303	0.0493863	0.0261024	0.0219687	0.0472335	0
ANK 3-3C-4	Teno	core	normal	Low T	2.12128	0.557433	1073.63	12.0133	48.687	1.456	5.676	0.248	3.25697	2.88632	0.068	0	14.804	21.854	0.471	0	99.4073	1.80344	0.196564	0	0	0.817481	0.0894104	0.0907848	0.0512292	0.0405566	0.00726295	0	0.00213345	0.867316	0.0338262	0	2	2	12	0.819385	9.7652	46.4519	43.7829	1.77421	0.0676524	0.0405566	0.0416469	0.0738038	0
ANK 5-5A-10	Teno	core	resorbed	Low T	2.38659	0.457374	1091.52	18.5739	51.402	1.007	3.339	0.513	0.870239	3.70194	0.063	0	15.655	22.645	0.355	0.013	99.5642	1.8931	0.106904	0	0	0.859521	0.114019	0.0241181	0.0380297	0.0278891	0.0149377	0	0.00196526	0.89356	0.0253493	0.000610791	2	2	11.9994	0.861538	7.40038	47.1988	45.4008	1.8671	0.0506985	0.0278891	0.0312849	0.0198406	0
ANK 5-5A-6	Teno	core	resorbed	Low T	2.17501	0.450142	1089.71	17.3905	51.486	0.992	3.44	0.56	0.289814	4.00122	0.051	0	15.934	22.28	0.312	0.003	99.349	1.89687	0.103129	0	0	0.875153	0.123281	0.00803488	0.0462424	0.0274835	0.0163121	0	0.00159149	0.879473	0.0222868	0.000141002	2	2	11.9999	0.869528	7.04134	46.5938	46.3649	1.87791	0.0445736	0.0274835	0.041032	0.00712955	0
ANK 5-5A-7	Teno	core	resorbed	Low T	3.20421	0.488716	1062.83	13.7791	51.262	1.003	3.192	0.508	1.50443	3.10228	0.092	0	16.01	22.443	0.369	0	99.4857	1.88788	0.11212	0	0	0.878984	0.0955469	0.0416929	0.0264284	0.0277774	0.0147916	0	0.00286981	0.885561	0.0263481	0	2	2	12	0.864951	7.35617	46.4946	46.1493	1.86009	0.0526962	0.0277774	0.021945	0.0346199	0
ANK 5-5A-8	Teno	core	resorbed	Low T	2.89951	0.525647	1071.7	20.3221	49.95	1.346	4.473	0.284	1.30001	3.94423	0.062	0	15.114	22.155	0.335	0.017	98.9802	1.85468	0.145325	0	0	0.836609	0.122476	0.0363237	0.0504202	0.0375828	0.00833728	0	0.00194989	0.881379	0.0241169	0.000805263	2	2	11.9992	0.840468	8.55625	46.9134	44.5304	1.84046	0.0482338	0.0375828	0.0407802	0.0293788	0
ANK 5-5B-10	Teno	core	resorbed	Low T	4.11405	1.08775	1102.15	27.1269	51.692	0.789	3.668	1.215	0.261295	4.07588	0.098	0	16.33	21.068	0.484	0	99.6812	1.895	0.105002	0	0	0.892447	0.124958	0.0072082	0.0534779	0.0217508	0.0352156	0	0.00304297	0.827499	0.0344013	0	2	2	12	0.871009	7.28829	44.6054	48.1063	1.8449	0.0688026	0.0217508	0.0534779	0.0072082	0.000814319
ANK 5-5B-6	Teno	core	resorbed	Low T	3.89227	0.828829	1035.3	15.3204	51.958	0.783	3.622	1.258	0	4.152	0.054	0	16.258	20.916	0.372	0.02	99.393	1.9116	0.088404	0	0	0.891706	0.127749	0	0.0686508	0.0216629	0.036593	0	0.00168277	0.824481	0.0265357	0.000938707	2	2	12.0318	0.874689	7.01292	44.6724	48.3147	1.84394	0.0530714	0.0216629	0.0450781	0	0
ANK 5-5B-8	Teno	core	resorbed	Low T	2.65428	0.498295	1072.45	16.691	51.532	0.975	3.199	0.503	0.643445	3.79402	0.076	0	15.921	22.3	0.354	0.011	99.3085	1.90011	0.0998903	0	0	0.87515	0.116992	0.0178535	0.039129	0.0270345	0.0146637	0	0.00237357	0.880978	0.0253075	0.000517429	2	2	11.9995	0.866489	7.24745	46.5302	46.2224	1.87312	0.050615	0.0270345	0.0314647	0.0143565	0
ANK 5-5B-9	Teno	core	resorbed	Low T	4.08998	1.14174	1111.11	26.1476	51.689	0.863	3.638	1.265	0.489314	3.93971	0.063	0	16.116	21.572	0.473	0.007	100.115	1.88981	0.110194	0	0	0.878389	0.120459	0.0134622	0.0465676	0.0237269	0.0365665	0	0.00195095	0.845022	0.0335293	0.000326493	2	2	11.9997	0.867707	7.30777	45.4488	47.2434	1.84387	0.0670586	0.0237269	0.0465676	0.0134622	0.00271071
ANK 5-5C-10	Teno	core	patchy-obscillatory	Low T	3.22895	0.676146	1087.46	19.1174	50.357	1.022	3.673	0.818	1.09499	3.69671	0.059	0	15.232	22.388	0.328	0.007	98.6757	1.87539	0.124609	0	0	0.845668	0.115134	0.0306868	0.0366089	0.0286217	0.0240857	0	0.0018611	0.893318	0.0236837	0.000332573	2	2	11.9997	0.852927	7.82766	47.349	44.8234	1.85412	0.0473675	0.0286217	0.0366089	0.0306868	6.93885e-05
ANK 5-5C-6	Teno	core	patchy-obscillatory	Low T	4.0553	0.608866	1096.87	17.9236	50.406	1.346	3.953	0.263	2.05716	3.29693	0.082	0	15.314	22.795	0.342	0.005	99.8601	1.85689	0.143114	0	0	0.841012	0.101571	0.0570272	0.0285144	0.0372872	0.00766007	0	0.0025586	0.899707	0.0244272	0.000234979	2	2	11.9998	0.84134	8.47356	47.3063	44.2201	1.84229	0.0488544	0.0372872	0.0228469	0.0456925	0
ANK 5-5C-7	Teno	core	patchy-obscillatory	Low T	4.30301	0.582287	1103.9	23.7035	50.97	1.233	3.516	0.214	1.19024	3.663	0.077	0	15.737	22.561	0.293	0	99.4542	1.8802	0.119796	0	0	0.865412	0.113001	0.0330396	0.033065	0.0342031	0.00624134	0	0.00240584	0.891676	0.0209557	0	2	2	12	0.855613	7.7903	46.794	45.4157	1.87009	0.0419114	0.0342031	0.025705	0.0256853	0
ANK 5-5C-8	Teno	core	patchy-obscillatory	Low T	3.85047	0.587576	1104.94	22.9336	51.016	1.168	3.466	0.222	0.712797	4.08061	0.087	0	15.643	22.458	0.26	0.007	99.1204	1.88821	0.111786	0	0	0.863129	0.126307	0.0198528	0.0394075	0.0325087	0.00649638	0	0.00272741	0.890583	0.0186579	0.000330521	2	2	11.9997	0.855186	7.82545	46.8088	45.3658	1.88002	0.0373158	0.0325087	0.0311005	0.0156679	0
ANK 5-5C-9	Teno	core	patchy-obscillatory	Low T	2.76628	0.503946	1074.54	15.1652	50.518	1.032	3.684	0.522	1.64628	3.27565	0.075	0	15.574	22.3	0.347	0.014	98.9879	1.87293	0.127071	0	0	0.860768	0.101561	0.0459292	0.0339023	0.0287718	0.015301	0	0.00235517	0.885806	0.024943	0.000662155	2	2	11.9993	0.853717	7.90151	46.7094	45.3891	1.84814	0.049886	0.0287718	0.0295264	0.0400009	0
ANK 5-5D-10	Teno	core	resorbed	Low T	3.24357	0.734005	1098.28	16.561	49.711	1.415	4.401	0.263	2.28177	3.17082	0.077	0	14.935	22.682	0.384	0.001	99.3216	1.84258	0.157423	0	0	0.825257	0.0982882	0.0636438	0.0348346	0.0394404	0.00770731	0	0.00241741	0.900768	0.0275962	4.72857e-05	2	2	12	0.835967	8.69401	47.6503	43.6557	1.82431	0.0551923	0.0394404	0.0277826	0.0507596	0
ANK 5-5D-6	Teno	core	resorbed	Low T	2.73588	0.445288	1080.99	17.048	51.461	1.05	3.446	0.403	0.925574	3.59415	0.069	0	15.88	22.446	0.367	0.016	99.6577	1.89115	0.108846	0	0	0.869981	0.110459	0.0255959	0.0404067	0.0290168	0.0117092	0	0.00214775	0.883784	0.0261492	0.00075011	2	2	11.9992	0.864761	7.30471	46.7124	45.9829	1.86422	0.0522985	0.0290168	0.0311074	0.0197052	0
ANK 5-5D-7	Teno	core	resorbed	Low T	3.78191	0.472893	1106.8	19.7631	50.522	1.248	3.758	0.312	2.39275	2.75096	0.073	0	15.449	22.91	0.385	0.011	99.8117	1.86022	0.139784	0	0	0.847996	0.0847078	0.0662966	0.0232957	0.0345549	0.00908262	0	0.00227663	0.903788	0.0274845	0.000516692	2	2	11.9995	0.848845	8.04597	47.4413	44.5127	1.83649	0.054969	0.0345549	0.0183765	0.0522972	0
ANK 5-5D-8	Teno	core	resorbed	Low T	2.83029	0.462155	1098.47	14.3415	51.433	1.046	3.279	0.408	0.759874	3.71325	0.081	0	15.808	22.699	0.299	0	99.5261	1.89408	0.105919	0	0	0.867849	0.114358	0.0210576	0.0363977	0.0289668	0.0118793	0	0.00252655	0.895616	0.0213487	0	2	2	12	0.865025	7.25475	47.1028	45.6425	1.87782	0.0426975	0.0289668	0.0303988	0.017587	0
ANK 5-5D-9	Teno	core	resorbed	Low T	3.42035	0.450438	1078.62	15.6924	51.333	1.064	3.207	0.396	1.38753	3.18048	0.076	0	16.004	22.593	0.344	0.004	99.589	1.88844	0.111561	0	0	0.877699	0.0978487	0.0384113	0.0274866	0.0294347	0.011518	0	0.00236813	0.89051	0.0245363	0.000187725	2	2	11.9998	0.865616	7.27005	46.7009	46.029	1.86606	0.0490726	0.0294347	0.0219782	0.0307136	0
ANK 7-7C-10	Roque del Conde	core	resorbed	Low T	2.28349	0.559817	1071.28	15.1638	48.582	1.526	6.024	0.214	3.14254	2.97528	0.097	0	14.68	21.731	0.511	0.004	99.4868	1.79772	0.202281	0	0	0.80981	0.0920727	0.0875062	0.0604377	0.0424632	0.00626086	0	0.00304021	0.861559	0.0366616	0.000188826	2	2	11.9998	0.818495	9.85007	46.4706	43.6794	1.76344	0.0733232	0.0424632	0.0479413	0.069413	0
ANK 7-7C-6	Roque del Conde	core	resorbed	Low T	1.91841	0.518003	1072.8	16.3067	48.961	1.409	5.737	0.244	3.04684	2.9254	0.058	0	14.741	22.178	0.461	0	99.7612	1.80677	0.193229	0	0	0.810943	0.0902805	0.0846084	0.0562857	0.0390999	0.00711896	0	0.00181287	0.876867	0.0329836	0	2	2	12	0.822598	9.47711	47.0293	43.4936	1.77809	0.0659672	0.0390999	0.045953	0.0690764	0
ANK 7-7C-7	Roque del Conde	core	resorbed	Low T	1.36024	0.329188	1061.53	31.2994	48.591	1.467	5.942	0.214	2.14562	3.90233	0.096	0	14.316	21.835	0.416	0	98.925	1.81025	0.189752	0	0	0.795087	0.12158	0.0601515	0.0711484	0.0410984	0.00630333	0	0.00302928	0.871554	0.0300483	0	2	2	12	0.813956	9.97952	47.0753	42.9451	1.78822	0.0600966	0.0410984	0.0582815	0.0492734	0
ANK 7-7C-8	Roque del Conde	core	resorbed	Low T	1.23925	0.318892	1062.21	28.2197	48.65	1.473	5.885	0.225	2.09936	4.00196	0.125	0	14.377	21.767	0.392	0.012	99.0073	1.81135	0.188649	0	0	0.797992	0.124609	0.058819	0.0695916	0.0412415	0.00662332	0	0.00394199	0.868314	0.0282976	0.000569977	2	2	11.9994	0.8131	10.108	46.8428	43.0492	1.79091	0.0565953	0.0412415	0.0575364	0.0486299	0
ANK 7-7F-10	Roque del Conde	core	resorbed	Low T	1.37873	0.452994	1040.74	21.6753	49.765	1.213	5.246	0.159	2.75867	3.1917	0.092	0	14.998	22.503	0.367	0.015	100.308	1.8261	0.173897	0	0	0.820437	0.0979444	0.0761749	0.0529789	0.0334714	0.00461288	0	0.0028594	0.884709	0.0261103	0.000702181	2	2	11.9993	0.824928	9.40313	47.0059	43.591	1.80309	0.0522206	0.0334714	0.0438726	0.0630816	0
ANK 7-7F-6	Roque del Conde	core	resorbed	Low T	1.73387	0.337547	1050.91	26.9318	49.058	1.295	5.587	0.194	2.07065	3.83679	0.106	0	14.61	21.899	0.383	0.002	99.0414	1.82347	0.176533	0	0	0.80956	0.119265	0.0579169	0.0682182	0.0361968	0.00570116	0	0.00333718	0.872109	0.0276014	9.48362e-05	2	2	11.9999	0.820437	9.69392	46.8325	43.4736	1.80093	0.0552028	0.0361968	0.0563225	0.0478175	0
ANK 7-7F-7	Roque del Conde	core	resorbed	Low T	1.40774	0.490002	1054.01	15.7279	49.124	1.329	5.681	0.25	3.19429	2.83572	0.09	0	15.013	22.161	0.4	0	100.078	1.80656	0.193442	0	0	0.823069	0.0872122	0.0883984	0.0527889	0.0367532	0.00726896	0	0.00280341	0.873185	0.0285209	0	2	2	12	0.824157	9.5171	46.5781	43.9048	1.78347	0.0570417	0.0367532	0.0448429	0.0750924	0
ANK 7-7F-9	Roque del Conde	core	resorbed	Low T	1.88181	0.368751	1051.02	30.024	48.62	1.488	5.976	0.279	1.64855	4.3316	0.117	0	14.143	21.877	0.382	0.005	98.8672	1.81358	0.186417	0	0	0.786457	0.135122	0.046274	0.0763024	0.0417386	0.00822812	0	0.00369653	0.874317	0.0276268	0.00023793	2	2	11.9998	0.812579	10.0274	47.3662	42.6064	1.7959	0.0552535	0.0417386	0.0640789	0.038861	0
ANK 1-1A-4	Teno	core	obscillatory	Low P	0.448378	0.541426	1101.46	21.8192	47.812	1.967	5.545	0.161	2.53065	3.69288	0.091	0	14.05	22.333	0.323	0	98.5055	1.79537	0.204631	0	0	0.786509	0.115968	0.0715088	0.040771	0.0555435	0.00477988	0	0.00289431	0.898509	0.023516	0	2	2	12	0.807516	10.151	47.9105	41.9385	1.80099	0.047032	0.0555435	0.0339675	0.0595762	0
ANK 2-2B-1	Teno	core	patchy	Low P	0.860009	0.758594	1093.72	17.9483	48.597	1.734	5.138	0.286	2.50231	3.21837	0.067	0	14.606	22.401	0.352	0.005	98.9067	1.81201	0.187993	0	0	0.811881	0.100356	0.0702106	0.0377966	0.0486196	0.00843122	0	0.00211598	0.894904	0.025447	0.000237836	2	2	11.9998	0.826386	9.18785	47.6148	43.1974	1.80714	0.0508941	0.0486196	0.0317588	0.0589948	0
ANK 3-3C-2	Teno	core	normal	Low P	0.981827	0.474163	1109.77	20.0667	48.293	1.523	5.999	0.326	2.64731	3.5059	0.095	0	14.412	21.709	0.431	0.004	98.9452	1.79936	0.200641	0	0	0.800514	0.109242	0.0742249	0.0627933	0.0426723	0.0096034	0	0.00299808	0.866627	0.0311355	0.00019013	2	2	11.9998	0.813546	10.0596	46.7536	43.1868	1.77638	0.0622709	0.0426723	0.0528384	0.0624576	0
ANK 3-3C-3	Teno	core	normal	Low P	1.78348	0.342617	1101.7	29.4392	49.047	1.493	5.791	0.284	1.70431	4.34243	0.097	0	14.6	21.391	0.457	0	99.2067	1.82017	0.179831	0	0	0.807724	0.134768	0.0475948	0.0734555	0.041665	0.00833281	0	0.003049	0.850529	0.0328821	0	2	2	12	0.815811	10.0567	46.1325	43.8108	1.79302	0.0657642	0.041665	0.0585585	0.0379424	0
ANK 3-3C-5	Teno	core	normal	Low P	1.30497	0.351239	1098.74	29.3909	48.829	1.46	5.77	0.276	2.04006	3.97232	0.088	0	14.481	21.673	0.444	0	99.0334	1.8161	0.183897	0	0	0.802919	0.123556	0.0570974	0.0690317	0.0408345	0.00811607	0	0.00277224	0.863655	0.0320177	0	2	2	12	0.81633	9.91489	46.6841	43.4011	1.79013	0.0640354	0.0408345	0.0559502	0.0462774	0
ANK 4-4B-10	Teno	core	resorbed	Low P	1.07576	0.363549	1101.61	27.5112	48.016	1.801	6.766	0.294	2.1147	4.43815	0.086	0	13.454	22.282	0.427	0	99.6789	1.78314	0.216855	0	0	0.74484	0.137835	0.0590964	0.0792811	0.0502952	0.00863221	0	0.00270511	0.886571	0.0307449	0	2	2	12	0.790893	10.9029	48.4188	40.6784	1.76925	0.0614898	0.0502952	0.066612	0.0496528	0
ANK 4-4B-11	Teno	core	resorbed	Low P	0.50473	0.376814	1134.69	14.5092	47.277	2.106	7.343	0.285	2.76119	4.40543	0.104	0	12.984	22.029	0.546	0.005	99.8456	1.75728	0.242717	0	0	0.719467	0.136942	0.0772323	0.0789634	0.0588657	0.0083755	0	0.00327425	0.877294	0.0393486	0.000237093	2	2	11.9998	0.770603	11.9859	48.3568	39.6573	1.7337	0.0786971	0.0588657	0.0631853	0.0618002	0
ANK 4-4B-7	Teno	core	resorbed	Low P	0.748501	0.318919	1127.1	21.715	47.672	1.805	6.553	0.318	2.25588	4.29812	0.099	0	13.471	21.873	0.465	0.012	98.822	1.78523	0.214766	0	0	0.752042	0.134607	0.0635709	0.0744553	0.0508301	0.00941527	0	0.00314017	0.877604	0.0337621	0.000573283	2	2	11.9994	0.79144	10.9952	47.9313	41.0736	1.76425	0.0675241	0.0508301	0.0610127	0.0520934	0
ANK 4-4B-9	Teno	core	resorbed	Low P	1.30004	0.345292	1111.95	33.4575	47.624	1.796	6.645	0.267	1.70082	4.94657	0.065	0	13.253	21.765	0.44	0	98.5024	1.79006	0.209939	0	0	0.742621	0.15549	0.0481074	0.0844331	0.0507645	0.00793464	0	0.00206939	0.876515	0.0320656	0	2	2	12	0.78483	11.2706	48.0334	40.6959	1.77463	0.0641311	0.0507645	0.0690608	0.0393487	0
ANK 4-4C-10	Teno	core	resorbed	Low P	0.745445	0.463556	1119.27	17.6151	51.276	0.844	4.093	0.415	0.0235197	4.86984	0.087	0	15.455	21.805	0.35	0.002	99.2204	1.89368	0.106324	0	0	0.850886	0.150405	0.000653635	0.0718292	0.0234394	0.0121175	0	0.00272143	0.862792	0.0250613	9.42276e-05	2	2	11.9999	0.849235	8.23472	46.2014	45.5638	1.86408	0.0501226	0.0234394	0.0589087	0.000536061	0
ANK 4-4C-6	Teno	core	resorbed	Low P	1.14273	0.448605	1133.05	15.3102	50.34	1.269	5.067	0.417	0.356516	5.1312	0.075	0	14.667	21.807	0.441	0	99.5707	1.85922	0.140778	0	0	0.807551	0.158487	0.00990849	0.0797828	0.0352445	0.0121767	0	0.0023462	0.862924	0.0315792	0	2	2	12	0.827454	9.2733	46.8671	43.8596	1.82896	0.0631584	0.0352445	0.0625237	0.00776503	0
ANK 4-4C-7	Teno	core	resorbed	Low P	0.759437	0.601256	1120.04	14.5808	50.558	1.236	4.903	0.396	0.645997	4.62972	0.089	0	14.758	22.194	0.454	0	99.8637	1.86093	0.139069	0	0	0.809802	0.142512	0.0178929	0.0736284	0.0342114	0.0115242	0	0.0027747	0.875255	0.0323997	0	2	2	12	0.834669	8.82894	47.3562	43.8148	1.82757	0.0647993	0.0342114	0.0568341	0.0138117	0
ANK 4-4C-8	Teno	core	resorbed	Low P	0.856592	0.418165	1115.74	20.4145	51.436	0.931	4.012	0.419	0	4.884	0.078	0	15.361	21.922	0.323	0.011	99.377	1.89846	0.101536	0	0	0.845211	0.150753	0	0.0729876	0.0258403	0.0122271	0	0.00243846	0.86691	0.0231144	0.000517946	2	2	12.0112	0.848636	8.21266	46.4753	45.312	1.86287	0.0462287	0.0258403	0.0498558	0	0
ANK 4-4C-9	Teno	core	resorbed	Low P	1.48875	0.360983	1109.68	22.2626	49.985	1.246	5.086	0.358	0.656485	4.66628	0.057	0	14.565	22.174	0.387	0	99.1808	1.85361	0.146386	0	0	0.805195	0.144713	0.0183196	0.0759019	0.0347464	0.0104963	0	0.00179036	0.881013	0.027825	0	2	2	12	0.831618	8.90438	47.5958	43.4998	1.83092	0.05565	0.0347464	0.0619425	0.0149503	0
ANK 4-4D-1	Teno	core	resorbed	Low P	1.93585	0.375315	1111.71	29.5437	48.796	1.515	5.812	0.353	1.20936	4.96979	0.096	0	14.094	21.578	0.403	0.002	98.8282	1.82201	0.17799	0	0	0.784533	0.155189	0.0339808	0.0777804	0.0425394	0.0104211	0	0.00303615	0.863249	0.0291753	9.52693e-05	2	2	11.9999	0.805721	10.446	46.916	42.6379	1.80297	0.0583507	0.0425394	0.0646621	0.0282496	0
ANK 4-4D-2	Teno	core	resorbed	Low P	1.84687	0.439122	1132.03	16.817	49.684	1.412	5.732	0.379	0.987084	4.8268	0.101	0	14.251	21.986	0.47	0	99.8289	1.83372	0.166277	0	0	0.784103	0.148982	0.0274146	0.0830575	0.039189	0.0110594	0	0.00315736	0.869405	0.0336325	0	2	2	12	0.816349	9.79529	47.4291	42.7756	1.80249	0.067265	0.039189	0.0660861	0.0218129	0
ANK 4-4D-3	Teno	core	resorbed	Low P	2.22815	0.347961	1126.22	29.3678	49.134	1.574	6.037	0.34	1.38554	4.60426	0.086	0	14.189	21.88	0.462	0.003	99.6948	1.81705	0.182952	0	0	0.782252	0.142397	0.0385581	0.080175	0.0437725	0.00994116	0	0.00269382	0.866942	0.0331261	0.000141534	2	2	11.9999	0.812133	10.0199	47.3004	42.6797	1.79159	0.0662523	0.0437725	0.0644237	0.0309829	0
ANK 4-4D-5	Teno	core	resorbed	Low P	1.60627	0.356153	1124.21	27.6982	48.653	1.637	6.178	0.337	1.56145	4.75798	0.101	0	13.858	21.898	0.438	0	99.4194	1.80796	0.192036	0	0	0.7677	0.147863	0.0436636	0.0785388	0.0457447	0.00990111	0	0.00317898	0.871853	0.0315572	0	2	2	12	0.800332	10.6149	47.5316	41.8534	1.78742	0.0631144	0.0457447	0.0646206	0.0359258	0
ANK 7-7D-10	Roque del Conde	core	resorbed	Low P	0.667776	0.452136	1096.54	15.5838	47.164	1.911	6.998	0.235	3.97164	3.03525	0.081	0	13.55	22.237	0.492	0.024	99.6989	1.75266	0.247339	0	0	0.75065	0.0943274	0.111063	0.0591536	0.0534023	0.00690445	0	0.00254952	0.885364	0.0354484	0.00113777	2	2	11.9989	0.785166	11.2768	48.0145	40.7087	1.73034	0.0708968	0.0534023	0.0488386	0.0916959	0
ANK 7-7D-6	Roque del Conde	core	resorbed	Low P	0.0922197	0.237271	1129.41	15.7584	46.583	2.358	7.341	0.153	2.98517	4.20789	0.092	0	13.021	21.919	0.474	0.01	99.1441	1.74468	0.255317	0	0	0.727016	0.131798	0.0841334	0.0687269	0.0664118	0.00453059	0	0.00291852	0.879566	0.0344201	0.000477799	2	2	11.9995	0.771003	11.989	48.184	39.8271	1.73838	0.0688401	0.0664118	0.0550736	0.0674195	0
ANK 7-7D-7	Roque del Conde	core	resorbed	Low P	0.0782001	0.249447	1121.06	17.7343	46.708	2.313	7.263	0.155	3.18151	3.90622	0.107	0	13.151	22.013	0.484	0.009	99.2907	1.74574	0.254257	0	0	0.732754	0.122096	0.0894814	0.0656793	0.0650095	0.00458031	0	0.00338734	0.881509	0.0350735	0.000429129	2	2	11.9996	0.77595	11.7517	48.1902	40.0581	1.73636	0.0701469	0.0650095	0.0525899	0.0716485	0
ANK 7-7D-8	Roque del Conde	core	resorbed	Low P	-0.00255167	0.276905	1115.74	17.6153	46.679	2.28	7.369	0.176	3.59687	3.61747	0.125	0	13.039	22.303	0.496	0.002	99.6833	1.73926	0.260739	0	0	0.724266	0.112721	0.100851	0.0628629	0.0638837	0.00518477	0	0.00394493	0.890359	0.0358318	9.5067e-05	2	2	11.9999	0.772272	11.8723	48.5966	39.5311	1.72735	0.0716637	0.0638837	0.0510585	0.0819129	0
ANK 7-7D-9	Roque del Conde	core	resorbed	Low P	0.616304	0.361174	1112.47	20.441	46.777	2.252	7.414	0.153	2.1343	4.91652	0.118	0	13.072	21.47	0.456	0	98.7628	1.75652	0.243478	0	0	0.731769	0.154396	0.0603097	0.0846418	0.0635919	0.00454241	0	0.00375309	0.863797	0.0331994	0	2	2	12	0.773152	12.0428	47.6177	40.3395	1.74996	0.0663988	0.0635919	0.0679081	0.0483864	0
ANK 7-7C-9	Roque del Conde	core	resorbed	Low P	1.29769	0.335128	1091.96	26.4457	49.004	1.369	5.645	0.298	2.05491	3.95296	0.099	0	14.493	21.878	0.412	0	99.2059	1.81997	0.180035	0	0	0.802418	0.122775	0.0574295	0.0670546	0.0382338	0.00875027	0	0.00311424	0.870558	0.029667	0	2	2	12	0.816609	9.87552	46.8976	43.2269	1.79575	0.0593339	0.0382338	0.0557877	0.0477798	0
ANK 7-7E-10	Roque del Conde	core	resorbed?	Low P	0.626861	0.368089	1075.23	21.8438	48.557	1.498	6.068	0.289	2.81245	3.5323	0.082	0	14.289	22.076	0.432	0.012	99.6478	1.79823	0.201769	0	0	0.788871	0.109398	0.0783773	0.0630802	0.0417174	0.00846185	0	0.00257213	0.875937	0.0310186	0.000566932	2	2	11.9994	0.807735	10.2604	47.2164	42.5232	1.77421	0.0620371	0.0417174	0.0527687	0.0655652	0
ANK 7-7E-6	Roque del Conde	core	resorbed?	Low P	1.33686	0.447428	1085.72	18.4406	48.106	1.597	6.355	0.26	2.89962	3.36587	0.093	0	14.266	21.805	0.46	0	99.2075	1.78834	0.211663	0	0	0.790611	0.104641	0.0811152	0.0667724	0.0446444	0.00764183	0	0.00292832	0.86849	0.0331552	0	2	2	12	0.809747	10.2114	47.0016	42.7869	1.76374	0.0663105	0.0446444	0.0552529	0.0671213	0
ANK 7-7E-7	Roque del Conde	core	resorbed?	Low P	1.78744	0.312813	1105.11	31.8876	48.549	1.628	6.38	0.285	1.72451	4.52026	0.07	0	13.894	21.826	0.463	0.016	99.3558	1.80361	0.19639	0	0	0.769485	0.140437	0.0482101	0.0829552	0.0454809	0.00837107	0	0.00220265	0.86875	0.0333494	0.000758296	2	2	11.9992	0.803109	10.4342	47.4964	42.0694	1.77867	0.0666987	0.0454809	0.0666782	0.0387506	0
ANK 7-7E-8	Roque del Conde	core	resorbed?	Low P	1.8077	0.352135	1097.98	26.3645	49.173	1.455	5.848	0.266	1.7867	4.3303	0.11	0	14.361	21.837	0.442	0.013	99.622	1.8194	0.180595	0	0	0.792133	0.133991	0.0497468	0.0744217	0.0404835	0.00778141	0	0.00344732	0.865674	0.031708	0.000613624	2	2	11.9994	0.811719	10.1456	46.9202	42.9342	1.7918	0.063416	0.0404835	0.0597133	0.039915	0
ANK 7-7E-9	Roque del Conde	core	resorbed	Low P	1.61139	0.319397	1105.99	30.8891	48.772	1.495	5.94	0.352	1.65669	4.36928	0.088	0	14.189	21.863	0.403	0.011	99.139	1.81439	0.185613	0	0	0.786904	0.135933	0.046378	0.0748256	0.0418228	0.0103532	0	0.00277286	0.87142	0.0290676	0.000522046	2	2	11.9995	0.811898	10.0403	47.2722	42.6875	1.79426	0.0581351	0.0418228	0.0629499	0.0390173	0
ANK 7-7F-8	Roque del Conde	core	normal,resorbed	Low P	0.997435	0.394804	1107.84	20.1292	48.902	1.437	5.867	0.352	2.38018	3.87627	0.088	0	14.496	21.837	0.428	0	99.6635	1.80918	0.190817	0	0	0.799493	0.119929	0.066264	0.0650008	0.0399783	0.0102961	0	0.00275756	0.86558	0.0307004	0	2	2	12	0.811103	10.1914	46.6866	43.122	1.785	0.0614008	0.0399783	0.0548968	0.0559637	0
ANK 1-1A-8	Teno	rim		Low T	2.18101	0.681075	1088.71	14.2446	48.428	1.695	4.908	0.146	3.57612	2.42215	0.104	0	14.459	22.916	0.382	0	99.0363	1.80608	0.193921	0	0	0.803876	0.0755434	0.100361	0.0218054	0.0475359	0.00430494	0	0.00328518	0.915667	0.0276215	0	2	2	12	0.820466	9.4373	48.2252	42.3375	1.79509	0.0552431	0.0475359	0.0176436	0.0812057	0
ANK 1-1A-6	Teno	rim		Low T	1.79116	0.709032	1115.28	22.5683	47.97	2.013	5.327	0.105	2.63901	3.45437	0.062	0	13.938	22.651	0.383	0.004	98.5464	1.80056	0.199443	0	0	0.779917	0.108433	0.0745399	0.0362134	0.0568189	0.00311602	0	0.00197113	0.910926	0.0278728	0.000191537	2	2	11.9998	0.809975	9.85956	48.5623	41.5781	1.79928	0.0557456	0.0568189	0.0280559	0.057749	0
ANK 1-1A-7	Teno	rim		Low T	1.60934	0.752394	1102.65	18.4425	47.991	1.991	5.375	0.155	2.43288	3.53585	0.061	0	14.11	22.668	0.294	0.007	98.6207	1.79934	0.200658	0	0	0.788663	0.110867	0.0686414	0.0368575	0.0561355	0.00459472	0	0.00193718	0.910596	0.021372	0.000334818	2	2	11.9997	0.81459	9.64776	48.4178	41.9344	1.81013	0.042744	0.0561355	0.0308792	0.0575076	0
ANK 1-1C-1	Teno	rim		Low T	0.651861	0.713807	1116.72	19.7517	47.58	1.982	5.418	0.186	3.63918	2.6854	0.096	0	14.227	22.674	0.32	0	98.8076	1.78216	0.217837	0	0	0.794414	0.0841178	0.102574	0.021341	0.0558263	0.0055082	0	0.00304565	0.909934	0.023239	0	2	2	12	0.809713	10.0174	48.0408	41.9418	1.78847	0.046478	0.0558263	0.0182874	0.0878969	0
ANK 1-1C-2	Teno	rim		Low T	1.71653	0.834168	1111.14	21.5433	48.262	1.939	5.362	0.226	2.23221	3.90441	0.104	0	14.001	22.713	0.299	0	99.0426	1.80354	0.196462	0	0	0.779991	0.12202	0.0627721	0.039698	0.0544891	0.00667732	0	0.00329185	0.909396	0.0216638	0	2	2	12	0.808462	10.018	48.4373	41.5448	1.81141	0.0433277	0.0544891	0.033892	0.0535915	0
ANK 1-1C-3	Teno	rim		Low T	2.13312	0.867548	1118.71	22.2821	48.635	1.852	4.98	0.191	2.49218	3.47549	0.09	0	14.327	22.755	0.333	0.006	99.1367	1.81308	0.186915	0	0	0.796224	0.108353	0.0699133	0.0318898	0.0519185	0.00562958	0	0.00284183	0.908876	0.024069	0.000285349	2	2	11.9997	0.817067	9.60171	48.1854	42.2129	1.81345	0.048138	0.0519185	0.0260242	0.0570541	0
ANK 1-1C-4	Teno	rim		Low T	1.50554	0.646314	1108.52	17.8256	48.317	2.011	5.302	0.172	1.97295	4.1017	0.08	0	14.187	22.402	0.299	0.008	98.8527	1.80729	0.192711	0	0	0.791096	0.128306	0.0555336	0.0410256	0.0565655	0.00508663	0	0.00253457	0.897786	0.0216842	0.000381746	2	2	11.9996	0.811434	9.93861	47.8754	42.186	1.81719	0.0433684	0.0565655	0.0338115	0.0457684	0
ANK 1-1D-1	Teno	rim		Low T	0.301074	0.335777	1132.86	19.4015	47.573	2.286	6.219	0.202	2.30372	4.33607	0.097	0	13.575	22.383	0.352	0	99.3268	1.77636	0.223637	0	0	0.755652	0.135402	0.064731	0.0500481	0.0641888	0.00596343	0	0.00306781	0.895464	0.0254834	0	2	2	12	0.790609	10.9582	48.2908	40.751	1.78652	0.0509669	0.0641888	0.0415366	0.0537225	0
ANK 1-1D-2	Teno	rim		Low T	0.331795	0.648174	1111.66	20.8704	47.895	2.049	5.602	0.165	3.45209	3.00975	0.103	0	14.199	22.817	0.314	0	99.6058	1.78059	0.219408	0	0	0.786942	0.0935752	0.0965755	0.0260494	0.0572833	0.00484989	0	0.00324338	0.908848	0.0226333	0	2	2	12	0.805391	10.2369	48.108	41.6551	1.78937	0.0452666	0.0572833	0.0222716	0.0825699	0
ANK 1-1D-3	Teno	rim		Low T	-0.0658913	0.374633	1133.64	19.5758	47.04	2.339	6.129	0.217	2.95237	3.6504	0.042	0	13.654	22.347	0.361	0.005	98.7368	1.76662	0.233377	0	0	0.764447	0.11465	0.083437	0.037908	0.066057	0.00644333	0	0.00133602	0.899196	0.0262862	0.000239554	2	2	11.9998	0.794203	10.704	48.2643	41.0317	1.77829	0.0525724	0.066057	0.0316343	0.0696283	0
ANK 1-1D-4	Teno	rim		Low T	0.122799	0.591133	1135.31	21.4644	47.517	2.212	5.813	0.201	2.82562	3.63045	0.109	0	13.631	22.547	0.4	0.009	98.8951	1.78116	0.218838	0	0	0.761716	0.113808	0.079704	0.0379736	0.0623522	0.00595696	0	0.00346072	0.905528	0.0290709	0.000430381	2	2	11.9996	0.797418	10.566	48.5742	40.8598	1.78105	0.0581418	0.0623522	0.030376	0.0637572	0
ANK 2-2A-10	Teno	rim		Low T	0.0588235	0.407847	1141.41	19.0864	47.334	2.232	6.053	0.299	2.58335	3.67845	0.08	0	13.766	22.247	0.383	0.01	98.6658	1.7764	0.223596	0	0	0.770171	0.115449	0.0729563	0.0441344	0.0629904	0.00887184	0	0.00254299	0.894537	0.0278684	0.000478768	2	2	11.9995	0.803453	10.2901	48.206	41.5039	1.78016	0.0557367	0.0629904	0.0367937	0.0608217	0
ANK 2-2A-6	Teno	rim		Low T	0.114437	0.332998	1151.89	19.4228	47.175	2.188	6.227	0.356	2.66009	3.8704	0.083	0	13.611	22.189	0.369	0.007	98.7355	1.77119	0.22881	0	0	0.761823	0.121525	0.0751554	0.0467337	0.061775	0.0105676	0	0.00263947	0.892585	0.0268611	0.00033528	2	2	11.9997	0.794805	10.7524	48.1508	41.0968	1.77593	0.0537222	0.061775	0.0403581	0.0649023	0
ANK 2-2A-7	Teno	rim		Low T	0.0720093	0.431754	1115.42	21.3161	47.452	2.082	5.876	0.252	2.69561	3.62944	0.066	0	13.93	22.283	0.323	0.013	98.6021	1.78147	0.218526	0	0	0.779627	0.113952	0.0761541	0.0414691	0.0587784	0.00747996	0	0.00209872	0.896308	0.023511	0.000622622	2	2	11.9994	0.803961	10.2886	47.9786	41.7328	1.78989	0.0470221	0.0587784	0.0355977	0.0653718	0
ANK 2-2A-9	Teno	rim		Low T	1.38579	0.364791	1126.68	19.7081	47.726	2.334	6.224	0.108	1.15749	5.71847	0.083	0	13.257	21.934	0.352	0	98.894	1.79132	0.20868	0	0	0.741778	0.179496	0.0326924	0.0666454	0.0658766	0.00320491	0	0.00263865	0.882053	0.0256156	0	2	2	12	0.777573	11.6839	47.9726	40.3435	1.80333	0.0512313	0.0658766	0.0516101	0.025317	0
ANK 2-2B-10	Teno	rim		Low T	0.605635	0.482879	1086.32	16.7434	48.482	1.96	5.362	0.115	2.60253	3.6352	0.099	0	14.453	22.317	0.35	0.007	99.3827	1.80242	0.197581	0	0	0.801021	0.113021	0.0728084	0.0373616	0.0547953	0.00338024	0	0.00311743	0.888934	0.0252283	0.000331994	2	2	11.9997	0.811694	10.0562	47.3114	42.6324	1.80298	0.0504566	0.0547953	0.0298398	0.0581502	0
ANK 2-2B-6	Teno	rim		Low T	1.87572	0.533107	1102.17	21.9129	48.118	1.998	5.587	0.218	1.62465	4.32711	0.111	0	13.97	22.201	0.334	0	98.4888	1.80601	0.193989	0	0	0.781663	0.135821	0.0458863	0.0531548	0.0563924	0.00646909	0	0.00352876	0.892779	0.0243054	0	2	2	12	0.811384	9.96065	48.0072	42.0322	1.81026	0.0486109	0.0563924	0.0435821	0.0376226	0
ANK 2-2B-7	Teno	rim		Low T	0.2939	0.464889	1081.14	14.7097	48.183	1.997	5.576	0.145	3.07551	3.2456	0.082	0	14.44	22.38	0.36	0	99.4841	1.78999	0.210012	0	0	0.799713	0.100834	0.0859773	0.0341279	0.0557887	0.00425891	0	0.00258022	0.890789	0.02593	0	2	2	12	0.810637	10.0746	47.3851	42.5403	1.79134	0.0518601	0.0557887	0.0279701	0.0704641	0
ANK 2-2B-9	Teno	rim		Low T	0.866529	0.564906	1068.93	13.1463	48.85	1.606	4.918	0.208	2.58833	3.05697	0.086	0	14.968	22.168	0.345	0.01	98.8043	1.82035	0.179653	0	0	0.831503	0.0952658	0.0725806	0.0363386	0.0450036	0.00612811	0	0.0027144	0.885064	0.024926	0.000475386	2	2	11.9995	0.832044	9.03812	46.9	44.0618	1.81183	0.049852	0.0450036	0.0299085	0.0597375	0
ANK 2-2C-6	Teno	rim		Low T	0.251196	0.431824	1101.97	18.0316	47.97	2.083	5.746	0.175	2.77252	3.48624	0.088	0	14.238	22.293	0.363	0.011	99.2258	1.78739	0.212605	0	0	0.79088	0.108634	0.0777385	0.0397285	0.0583649	0.0051554	0	0.00277728	0.889975	0.0262242	0.000522877	2	2	11.9995	0.80929	10.1149	47.5921	42.2929	1.78949	0.0524483	0.0583649	0.032426	0.0634494	0
ANK 2-2C-7	Teno	rim		Low T	0.12987	0.461693	1096.77	17.3116	47.799	1.987	5.451	0.13	2.84375	3.60314	0.088	0	14.354	22.035	0.309	0	98.5999	1.79267	0.207332	0	0	0.802536	0.11301	0.0802571	0.0336115	0.0560391	0.00385477	0	0.00279544	0.885427	0.022469	0	2	2	12	0.805918	10.4066	46.9965	42.5969	1.80097	0.044938	0.0560391	0.028117	0.0671373	0
ANK 2-2C-9	Teno	rim		Low T	0.420078	0.499242	1080.67	14.1068	48.031	1.931	5.337	0.13	2.92222	3.23353	0.088	0	14.551	22.147	0.331	0	98.7018	1.79696	0.203043	0	0	0.811558	0.101169	0.0822698	0.0322847	0.0543263	0.00384533	0	0.00278859	0.887748	0.0240098	0	2	2	12	0.815638	9.87666	47.082	43.0413	1.80048	0.0480196	0.0543263	0.0266017	0.0677882	0
ANK 2-2D-6	Teno	rim		Low T	-0.247959	0.440413	1144.91	22.7265	47.666	2.16	5.686	0.323	3.00873	3.79769	0.096	0	13.966	21.993	0.424	0.002	99.1224	1.78229	0.217708	0	0	0.77849	0.118753	0.0846573	0.0328663	0.0607346	0.00954875	0	0.00304038	0.881076	0.0307383	9.54018e-05	2	2	11.9999	0.79284	11.0637	47.2169	41.7193	1.77832	0.0614767	0.0607346	0.0269138	0.0693248	0
ANK 2-2D-7	Teno	rim		Low T	0.225095	0.340155	1156.31	19.5189	47.231	2.144	6.297	0.459	2.77583	3.52226	0.085	0	13.813	22.137	0.381	0.015	98.8601	1.76892	0.231081	0	0	0.771222	0.110321	0.078232	0.0468735	0.0603834	0.0135915	0	0.00269641	0.888297	0.0276662	0.000716685	2	2	11.9993	0.803545	10.3335	47.9961	41.6704	1.76984	0.0553325	0.0603834	0.0413316	0.0689825	0
ANK 2-2D-8	Teno	rim		Low T	0.830769	0.581451	1107.87	15.3781	48.704	1.889	4.887	0.234	1.98935	3.99994	0.106	0	14.736	22.028	0.285	0.006	98.8643	1.81849	0.181508	0	0	0.820233	0.124898	0.0558946	0.0335463	0.0530384	0.00690775	0	0.00335227	0.881212	0.0206317	0.000285795	2	2	11.9997	0.819392	9.76592	46.734	43.5001	1.82634	0.0412635	0.0530384	0.0282917	0.0471394	0
ANK 4-4B-1	Teno	rim		Low P	-0.154825	0.35761	1125.02	11.3548	44.655	2.807	7.372	0.07	4.41604	3.31037	0.104	0	12.217	22.565	0.392	0	97.9084	1.70376	0.296238	0	0	0.694887	0.105626	0.126789	0.0352618	0.0805366	0.0021116	0	0.00336092	0.922429	0.0289981	0	2	2	12	0.749364	12.7234	49.7778	37.4988	1.72294	0.0579962	0.0805366	0.0294114	0.105753	0
ANK 4-4B-2	Teno	rim		Low P	0.0621671	0.200324	1132.12	6.72974	45.31	3.047	7.837	0.04	2.80128	5.06736	0.098	0	12.001	22.42	0.349	0.006	98.9766	1.71152	0.288484	0	0	0.675795	0.160075	0.0796258	0.0604113	0.0865508	0.00119459	0	0.00313544	0.907363	0.0255597	0.000289131	2	2	11.9997	0.738173	13.2989	49.6914	37.0097	1.74323	0.0511195	0.0865508	0.0497755	0.0656072	0
ANK 4-4B-3	Teno	rim		Low P	-0.0362024	0.203408	1104.64	11.669	45.873	2.592	6.937	0	3.59024	4.31744	0.11	0	12.646	22.161	0.388	0.007	98.6217	1.73497	0.265025	0	0	0.713017	0.136558	0.102181	0.0441944	0.0737196	0	0	0.00352383	0.898016	0.028452	0.000337746	2	2	11.9997	0.749159	13.072	48.4551	38.4729	1.74759	0.0569039	0.0737196	0.0355021	0.0820837	0
ANK 4-4B-4	Teno	rim		Low P	-0.0129518	0.187946	1135.01	5.2899	44.761	3.118	7.793	0.075	3.43765	4.46374	0.116	0	11.897	22.372	0.402	0.004	98.4394	1.70101	0.298994	0	0	0.673991	0.14186	0.0983057	0.0500415	0.0891034	0.00225341	0	0.00373379	0.910897	0.0296194	0.00019392	2	2	11.9998	0.737281	13.3367	49.8088	36.8545	1.72675	0.0592388	0.0891034	0.0407448	0.0800425	0
ANK 4-4B-5	Teno	rim		Low P	-0.222946	0.451227	1109.39	12.8473	45.122	2.683	7.474	0.087	4.73506	2.8033	0.119	0	13.071	22.34	0.327	0.002	98.7634	1.70138	0.29862	0	0	0.734738	0.0883973	0.134354	0.0335232	0.0760757	0.00259362	0	0.00380055	0.902516	0.0239059	9.62054e-05	2	2	11.9999	0.767359	12.1553	48.4233	39.4214	1.72565	0.0478118	0.0760757	0.0292481	0.11722	0
ANK 4-4B-6	Teno	rim		Low P	-0.158806	0.34372	1103.95	15.8082	45.801	2.579	6.773	0.019	4.27536	3.87595	0.135	0	12.795	22.096	0.418	0.006	98.7733	1.73034	0.26966	0	0	0.720622	0.122459	0.121546	0.0319158	0.0732689	0.000567524	0	0.00431993	0.894394	0.030618	0.000289177	2	2	11.9997	0.747047	13.3269	47.9995	38.6737	1.73747	0.061236	0.0732689	0.025606	0.0975161	0
ANK 5-5A-1	Teno	rim		Low T	2.33623	0.632899	1126.25	22.725	49.464	1.792	5.265	0.258	1.40627	4.57761	0.078	0	14.308	22.548	0.358	0.016	100.071	1.82564	0.174357	0	0	0.787257	0.141293	0.0390576	0.0546689	0.0497367	0.0075287	0	0.00243841	0.891648	0.0256185	0.000753361	2	2	11.9992	0.813611	9.81845	47.8944	42.2871	1.8202	0.051237	0.0497367	0.043678	0.0312053	0
ANK 5-5A-2	Teno	rim		Low T	3.35667	0.648129	1107.64	24.3543	49.421	1.59	4.634	0.191	1.14043	4.47182	0.1	0	14.705	22.069	0.316	0	98.6383	1.84594	0.154063	0	0	0.818806	0.139684	0.0320543	0.0499329	0.0446596	0.00564044	0	0.00316367	0.883175	0.0228843	0	2	2	12	0.826623	9.31873	47.0554	43.6259	1.84166	0.0457685	0.0446596	0.0394309	0.0253125	0
ANK 5-5A-4	Teno	rim		Low T	1.4697	0.773918	1139.48	15.5369	48.545	2.108	5.31	0.173	1.77921	4.70303	0.138	0	13.853	22.46	0.344	0.012	99.4252	1.80949	0.19051	0	0	0.769779	0.146604	0.0499057	0.042763	0.0590873	0.00509837	0	0.00435689	0.896974	0.0248608	0.000570623	2	2	11.9994	0.796635	10.7552	48.0277	41.2171	1.81336	0.0497215	0.0590873	0.0333801	0.0389556	0
ANK 5-5C-1	Teno	rim		Low T	1.51126	0.405071	1085.23	20.3823	48.049	2.224	6.11	0.129	1.72783	4.57626	0.09	0	13.817	22.445	0.299	0.005	99.4721	1.78853	0.211466	0	0	0.766721	0.142456	0.0483978	0.0565822	0.0622529	0.00379644	0	0.00283754	0.89514	0.0215788	0.000237432	2	2	11.9998	0.800691	10.4385	48.2412	41.3204	1.80432	0.0431577	0.0622529	0.0468699	0.0400903	0
ANK 5-5C-2	Teno	rim		Low T	0.84707	0.548375	1089.26	20.2098	47.974	2.044	5.655	0.098	2.61812	3.59817	0.081	0	14.098	22.575	0.317	0	99.0583	1.79141	0.208589	0	0	0.784797	0.112364	0.073568	0.0402859	0.0573961	0.00289327	0	0.00256189	0.903183	0.0229505	0	2	2	12	0.808461	10.0451	48.1319	41.823	1.80034	0.0459011	0.0573961	0.0331889	0.0606078	0
ANK 5-5D-1	Teno	rim		Low T	1.29989	0.612483	1099.17	20.4562	49.093	1.848	5.184	0.094	2.03536	4.22854	0.093	0	14.48	22.409	0.328	0	99.7929	1.8175	0.1825	0	0	0.799161	0.130919	0.0567032	0.0436928	0.051448	0.00275142	0	0.00291624	0.888865	0.0235436	0	2	2	12	0.809865	10.1428	47.3162	42.541	1.81894	0.0470872	0.051448	0.034644	0.0449599	0
ANK 5-5D-2	Teno	rim		Low T	-0.0540458	0.37908	1137.15	19.4937	47.325	2.316	6.15	0.213	2.83037	3.80318	0.078	0	13.613	22.44	0.376	0.01	99.1546	1.77018	0.229815	0	0	0.759089	0.118968	0.0796677	0.0413049	0.0651446	0.00629914	0	0.0024712	0.89931	0.0272684	0.000477182	2	2	11.9995	0.792596	10.8151	48.3628	40.8221	1.77737	0.0545369	0.0651446	0.0339823	0.0655439	0
ANK 5-5D-3	Teno	rim		Low T	-0.106886	0.353005	1134.85	18.9647	47.395	2.362	6.278	0.197	3.12514	3.63794	0.099	0	13.681	22.519	0.39	0.004	99.6881	1.76374	0.236264	0	0	0.758979	0.113217	0.0875148	0.0390841	0.0660987	0.00579617	0	0.00312049	0.89786	0.0281391	0.000189897	2	2	11.9998	0.790841	10.9557	48.2541	40.7901	1.77006	0.0562782	0.0660987	0.0321277	0.0719384	0
ANK 5-5D-4	Teno	rim		Low T	0.640827	0.623113	1100.23	21.1547	48.75	1.89	5.096	0.128	2.56675	3.63239	0.079	0	14.467	22.403	0.384	0.003	99.3991	1.81171	0.188287	0	0	0.801501	0.112892	0.071781	0.034918	0.0528188	0.00376096	0	0.00248673	0.89203	0.0276688	0.00014223	2	2	11.9999	0.812738	9.95165	47.431	42.6174	1.80642	0.0553376	0.0528188	0.0270475	0.0556015	0
ANK 7-7D-1	Roque del Conde	rim		Low P	-0.0369218	0.172439	1135.83	6.77115	45.207	2.941	7.771	0.065	3.36556	4.39161	0.103	0	12.344	22.18	0.379	0.009	98.7562	1.70861	0.291394	0	0	0.695509	0.138808	0.0957204	0.0547622	0.0835879	0.00194233	0	0.00329731	0.898165	0.0277728	0.000433945	2	2	11.9996	0.747829	12.9853	49.0399	37.9748	1.73248	0.0555456	0.0835879	0.0452043	0.0790139	0
ANK 7-7D-2	Roque del Conde	rim		Low P	-0.0943768	0.190635	1124.83	12.7266	45.567	2.809	7.95	0.07	3.81108	3.97572	0.104	0	12.421	22.571	0.404	0	99.6828	1.70554	0.294462	0	0	0.693072	0.124447	0.107342	0.0562395	0.0790633	0.00207149	0	0.00329709	0.90515	0.0293182	0	2	2	12	0.74938	12.823	49.3725	37.8045	1.72267	0.0586363	0.0790633	0.0468721	0.0894629	0
ANK 7-7D-4	Roque del Conde	rim		Low P	-0.1244	0.215566	1138.58	12.5446	46.039	2.774	7.471	0.211	2.98005	4.2275	0.097	0	12.862	22.384	0.345	0.005	99.3955	1.72448	0.275519	0	0	0.71821	0.132426	0.0839975	0.0542954	0.078136	0.00624869	0	0.00307744	0.898315	0.0250551	0.000238923	2	2	11.9998	0.768441	11.9552	48.9271	39.1177	1.74895	0.0501102	0.078136	0.0468179	0.0724296	0
ANK 7-7D-5	Roque del Conde	rim		Low P	-0.171526	0.179883	1134.34	10.989	45.559	2.684	7.784	0.1	3.37125	4.25048	0.108	0	12.314	22.376	0.406	0.01	98.9627	1.71686	0.283137	0	0	0.691785	0.133954	0.0956014	0.0625816	0.0760599	0.00297944	0	0.00344724	0.903446	0.0296641	0.000480748	2	2	11.9995	0.750846	12.7447	49.4163	37.839	1.72919	0.0593283	0.0760599	0.0518342	0.0791833	0
ANK 1-1B-1	Teno	rim		Low T	0.12216	0.611197	1116.83	24.4052	47.615	2.07	5.828	0.199	3.18123	3.20347	0.078	0	13.871	22.788	0.343	0.001	99.1777	1.77839	0.221611	0	0	0.772327	0.10006	0.0894107	0.0349326	0.0581387	0.00587638	0	0.00246754	0.911901	0.0248383	4.76474e-05	2	2	12	0.803004	10.2303	48.6045	41.1652	1.78429	0.0496765	0.0581387	0.0295921	0.0757416	0
ANK 1-1B-2	Teno	rim		Low T	1.10649	0.575478	1096.07	19.4241	48.316	1.949	5.378	0.129	2.15456	4.22629	0.057	0	14.166	22.41	0.276	0	99.0618	1.80469	0.19531	0	0	0.788805	0.132016	0.0605594	0.041441	0.0547439	0.00380956	0	0.00180332	0.896834	0.0199878	0	2	2	12	0.803771	10.3392	47.7035	41.9573	1.81766	0.0399756	0.0547439	0.034868	0.0509541	0
ANK 1-1B-3	Teno	rim		Low T	0.0737844	0.416145	1118.49	19.2983	47.197	2.351	6.147	0.171	3.1424	3.26841	0.091	0	13.722	22.586	0.382	0.007	99.0648	1.76561	0.234387	0	0	0.76526	0.102253	0.0884614	0.0366344	0.0661372	0.00505768	0	0.00288342	0.905272	0.027707	0.000334069	2	2	11.9997	0.800503	10.3854	48.5627	41.0519	1.77278	0.0554139	0.0661372	0.0299037	0.0722087	0
ANK 1-1B-4	Teno	rim		Low T	1.58525	0.810072	1091.42	21.1247	48.684	1.782	5.051	0.145	2.539	3.66736	0.098	0	14.354	22.641	0.314	0	99.2754	1.81289	0.187112	0	0	0.796835	0.114207	0.0711473	0.0345652	0.0499005	0.004269	0	0.00309098	0.903314	0.0226704	0	2	2	12	0.811284	9.97809	47.83	42.1919	1.81436	0.0453407	0.0499005	0.0285484	0.0587627	0
ANK 1-1B-5	Teno	rim		Low T	0.329846	0.372554	1102.37	20.9195	47.692	2.154	6.027	0.122	2.56323	3.90356	0.066	0	13.894	22.345	0.345	0	99.1118	1.78149	0.218508	0	0	0.773707	0.121943	0.0720505	0.0468294	0.0605057	0.00360306	0	0.00208818	0.894288	0.0249863	0	2	2	12	0.799532	10.519	47.9749	41.5062	1.78994	0.0499726	0.0605057	0.0384061	0.0590906	0
ANK 3-3C-10	Teno	rim		Low P	0.252999	0.217738	1123.12	8.89018	45.663	2.905	7.631	0.048	2.21676	5.27332	0.107	0	12.304	21.907	0.394	0.002	98.4511	1.72919	0.270806	0	0	0.694602	0.167001	0.0631698	0.069774	0.0827251	0.00143712	0	0.00343201	0.888834	0.0289281	9.66197e-05	2	2	11.9999	0.751106	12.8562	48.9166	38.2271	1.75044	0.0578562	0.0827251	0.0552949	0.0500613	0
ANK 3-3C-6	Teno	rim		Low P	0.0921102	0.201299	1128.64	11.2394	45.65	2.833	7.662	0.051	2.47617	5.01789	0.094	0	12.238	22.158	0.388	0.006	98.5741	1.72696	0.273038	0	0	0.690181	0.158752	0.0704911	0.0685823	0.0805936	0.00152541	0	0.00301201	0.898113	0.0284589	0.000289567	2	2	11.9997	0.750667	12.7574	49.332	37.9106	1.74705	0.0569178	0.0805936	0.0551576	0.0566928	0
ANK 3-3C-7	Teno	rim		Low P	0.00834432	0.187842	1131.39	10.696	45.672	2.892	7.67	0.058	2.73569	4.86137	0.081	0	12.317	22.34	0.365	0	98.9921	1.72136	0.27864	0	0	0.69205	0.153228	0.077589	0.0620633	0.0819657	0.00172832	0	0.00258579	0.902118	0.0266722	0	2	2	12	0.749892	12.7712	49.3616	37.8672	1.7474	0.0533444	0.0819657	0.0509779	0.0637305	0
ANK 3-3C-8	Teno	rim		Low P	0.0210819	0.193629	1137.69	10.3551	45.968	2.723	7.259	0.09	2.51811	5.00616	0.091	0	12.497	22.148	0.359	0	98.6593	1.73699	0.26301	0	0	0.703977	0.158199	0.0716023	0.0602696	0.0773752	0.0026888	0	0.00291252	0.896675	0.0263015	0	2	2	12	0.753902	12.6932	48.9087	38.3981	1.75885	0.052603	0.0773752	0.0494778	0.0587814	0
ANK 3-3C-9	Teno	rim		Low P	0.147996	0.30057	1117.94	14.4343	45.786	2.926	7.762	0.055	1.97043	5.60197	0.093	0	12.157	22.132	0.355	0.004	98.8424	1.72853	0.27147	0	0	0.684197	0.176865	0.0559778	0.0738934	0.0830674	0.00164165	0	0.00297381	0.895207	0.0259846	0.000192646	2	2	11.9998	0.746093	12.9911	49.3167	37.6922	1.75627	0.0519693	0.0830674	0.0599333	0.0454023	0
ANK 4-4A-2	Teno	rim		High T	0.11411	0.177819	1131.67	5.73734	45.67	2.992	7.699	0.046	3.01324	4.81363	0.118	0	12.339	22.212	0.413	0	99.3159	1.71664	0.283355	0	0	0.691417	0.151314	0.0852303	0.0577139	0.0845713	0.00136704	0	0.00375679	0.894531	0.0300984	0	2	2	12	0.745093	13.1582	48.9819	37.8599	1.73726	0.0601968	0.0845713	0.0461136	0.0680992	0
ANK 4-4A-3	Teno	rim		High T	0.411352	0.241904	1120.44	9.41223	45.497	3.106	7.996	0.014	2.43981	5.07161	0.125	0	12.041	22.36	0.407	0	99.0574	1.71449	0.285513	0	0	0.676433	0.159828	0.0691861	0.0696133	0.0880167	0.000417113	0	0.00398977	0.90278	0.0297365	0	2	2	12	0.74707	12.8574	49.8163	37.3263	1.73904	0.059473	0.0880167	0.0549084	0.0545715	0
ANK 4-4A-5	Teno	rim		High T	0.168363	0.236938	1137.52	6.4002	45.241	3.311	8.261	0.075	2.52965	5.39578	0.081	0	11.794	22.422	0.393	0.008	99.5114	1.70097	0.299029	0	0	0.661053	0.169658	0.0715708	0.0670347	0.093613	0.00222946	0	0.0025795	0.903229	0.0286485	0.000383717	2	2	11.9996	0.732646	13.4843	49.9548	36.5609	1.73394	0.057297	0.093613	0.0540719	0.0577309	0
ANK 4-4C-1	Teno	rim		Low P	1.06808	0.437686	1132.44	27.7359	47.018	2.546	6.612	0.072	1.45812	5.77495	0.12	0	12.613	22.357	0.319	0.003	98.8931	1.77109	0.228906	0	0	0.708282	0.181921	0.0413316	0.0646349	0.0721187	0.00214429	0	0.00382864	0.902297	0.0232977	0.000144163	2	2	11.9999	0.760339	12.3571	49.1003	38.5426	1.7925	0.0465953	0.0721187	0.0516444	0.0330247	0
ANK 4-4C-2	Teno	rim		Low P	0.263385	0.26104	1122.53	10.7416	46.657	2.58	7.055	0.041	2.26252	5.13115	0.117	0	12.571	22.26	0.411	0.009	99.0947	1.75343	0.246567	0	0	0.704292	0.161266	0.0639845	0.0659174	0.0729129	0.00121823	0	0.0037243	0.896306	0.0299474	0.00043149	2	2	11.9996	0.757676	12.5152	48.9899	38.4949	1.76186	0.0598947	0.0729129	0.0511201	0.0496212	0
ANK 4-4C-3	Teno	rim		Low P	0.050263	0.229696	1131.6	8.60889	44.542	3.356	8.685	0.063	2.49656	5.24355	0.082	0	11.608	22.108	0.413	0.007	98.6041	1.68902	0.310982	0	0	0.656195	0.166282	0.0712389	0.0771627	0.0956971	0.00188877	0	0.00263369	0.898199	0.030364	0.000338625	2	2	11.9997	0.734232	13.3825	50.0515	36.566	1.72068	0.060728	0.0956971	0.0621807	0.057407	0
ANK 4-4C-4	Teno	rim		Low P	0.304575	0.255908	1113.77	14.7229	45.936	2.816	7.725	0.026	2.2917	5.12289	0.109	0	12.193	22.436	0.375	0.003	99.0336	1.72975	0.270253	0	0	0.684464	0.161325	0.0649379	0.0725838	0.0797396	0.000774064	0	0.0034765	0.905177	0.0273782	0.000144114	2	2	11.9999	0.751558	12.6273	49.7519	37.6207	1.75097	0.0547564	0.0797396	0.0584661	0.0523073	0
ANK 4-4C-5	Teno	rim		Low P	0.0308081	0.177556	1122.41	10.2525	45.261	2.857	8.012	0.047	3.22176	4.43	0.097	0	12.132	22.307	0.422	0	98.7868	1.70949	0.290506	0	0	0.683104	0.139928	0.0915688	0.0661451	0.0811457	0.00140351	0	0.00310314	0.9027	0.030903	0	2	2	12	0.746888	12.8872	49.5879	37.5249	1.72573	0.0618059	0.0811457	0.053773	0.0744414	0
ANK 4-4D-10	Teno	rim		Low P	0.150616	0.246576	1136.51	6.81912	45.583	3.197	8.231	0.057	2.34637	5.6147	0.1	0	11.872	22.27	0.425	0	99.6961	1.70944	0.29056	0	0	0.663721	0.176089	0.0662153	0.0732399	0.0901583	0.00169005	0	0.00317641	0.894808	0.0309018	0	2	2	12	0.732563	13.6075	49.601	36.7914	1.73462	0.0618037	0.0901583	0.0578983	0.0523451	0
ANK 4-4D-11	Teno	rim		Low P	-0.0582775	0.176937	1131.81	11.1812	45.643	2.996	8.258	0.111	2.66486	4.96411	0.087	0	12.334	22.176	0.393	0	99.627	1.70858	0.291416	0	0	0.688298	0.155403	0.0750667	0.0729146	0.0843366	0.00328518	0	0.00275846	0.889414	0.0285232	0	2	2	12	0.749153	12.8789	49.1134	38.0078	1.73312	0.0570465	0.0843366	0.060479	0.0622641	0
ANK 4-4D-6	Teno	rim		Low P	0.695815	0.325592	1103.32	16.9738	47.17	2.464	6.633	0.046	2.41843	4.51585	0.098	0	13.197	22.591	0.315	0.025	99.4733	1.7621	0.237903	0	0	0.734937	0.141078	0.0679843	0.054131	0.0692176	0.00135861	0	0.00310082	0.904187	0.0228149	0.00119141	2	2	11.9988	0.778535	11.4603	48.841	39.6987	1.7802	0.0456298	0.0692176	0.0440917	0.0553758	0
ANK 4-4D-7	Teno	rim		Low P	0.279656	0.284218	1133.87	16.7237	47.017	2.529	6.792	0.084	2.07915	5.41414	0.117	0	12.611	22.391	0.382	0.008	99.4243	1.76221	0.237787	0	0	0.704634	0.169703	0.0586408	0.06224	0.0712795	0.00248918	0	0.00371429	0.899157	0.0277595	0.000382516	2	2	11.9996	0.755253	12.6404	48.9777	38.3819	1.77349	0.0555189	0.0712795	0.0490317	0.0461963	0
ANK 4-4D-8	Teno	rim		Low P	0.150534	0.315399	1123.23	11.5655	45.917	2.928	7.902	0.103	2.28599	5.03802	0.087	0	12.105	22.692	0.38	0	99.438	1.72271	0.277289	0	0	0.67704	0.158072	0.0645394	0.0721204	0.082608	0.00305527	0	0.00276468	0.912158	0.0276418	0	2	2	12	0.752558	12.4203	50.2684	37.3112	1.74727	0.0552837	0.082608	0.0591452	0.052928	0
ANK 4-4D-9	Teno	rim		Low P	0.759785	0.379905	1137.4	23.6213	47.153	2.579	6.786	0.063	1.19767	6.25032	0.1	0	12.597	22.079	0.347	0	99.152	1.77166	0.228345	0	0	0.705582	0.196394	0.0338624	0.0721541	0.0728674	0.00187148	0	0.00318241	0.888808	0.0252781	0	2	2	12	0.753957	12.7714	48.6264	38.6022	1.79078	0.0505561	0.0728674	0.0562238	0.0263861	0
ANK 5-5B-1	Teno	rim		Low T	0.472439	0.552117	1149.93	15.6508	47.99	2.41	5.953	0.262	2.05685	4.45721	0.083	0	13.646	22.56	0.383	0.002	99.8031	1.78351	0.21649	0	0	0.756033	0.13853	0.0575226	0.0442567	0.0673525	0.00769839	0	0.0026127	0.898302	0.0275974	9.48224e-05	2	2	11.9999	0.794081	10.7213	48.4782	40.8005	1.79286	0.0551947	0.0673525	0.0355628	0.0462227	0
ANK 5-5B-2	Teno	rim		Low T	2.44058	0.606086	1126.37	24.4392	48.672	1.995	5.618	0.221	1.25392	4.9127	0.097	0	13.802	22.47	0.342	0.002	99.3856	1.81243	0.187573	0	0	0.766186	0.152988	0.0351369	0.058987	0.0558646	0.0065065	0	0.00305942	0.896485	0.0246917	9.50097e-05	2	2	11.9999	0.802868	10.3128	48.3579	41.3293	1.81566	0.0493835	0.0558646	0.0475308	0.0283128	0
ANK 5-5B-3	Teno	rim		Low T	1.14098	0.447449	1136.99	13.231	48.405	2.164	5.735	0.219	1.52627	5.10863	0.079	0	13.723	22.229	0.356	0.015	99.5599	1.80219	0.197812	0	0	0.761675	0.159064	0.0427615	0.0538409	0.060587	0.00644656	0	0.00249128	0.886724	0.0256983	0.000712455	2	2	11.9993	0.790529	11.0279	47.8608	41.1113	1.80746	0.0513966	0.060587	0.042714	0.0339243	0
ANK 5-5B-4	Teno	rim		Low T	0.504927	0.252155	1121.95	13.092	46.937	2.615	6.893	0.117	1.98535	4.96354	0.084	0	13.069	22.158	0.376	0	99.1979	1.75813	0.241868	0	0	0.729775	0.155483	0.0559609	0.0624329	0.073658	0.00346494	0	0.00266503	0.889253	0.0273066	0	2	2	12	0.775351	11.6799	48.5099	39.8102	1.77451	0.0546133	0.073658	0.0498604	0.0446917	0
ANK 5-5B-5	Teno	rim		Low T	-0.0877503	0.422716	1149.22	17.5378	47.475	2.353	6.196	0.282	2.77588	3.96321	0.12	0	13.504	22.598	0.383	0	99.6501	1.76881	0.231195	0	0	0.750047	0.123486	0.0778264	0.0408784	0.0659248	0.00830688	0	0.00378689	0.902077	0.0276667	0	2	2	12	0.788395	11.0433	48.5713	40.3854	1.77561	0.0553335	0.0659248	0.0342114	0.0651335	0
ANK 7-7A-3	Roque del Conde	rim		High T	0.0256104	0.162134	1124.83	7.65066	45.882	2.873	7.561	0.044	3.26996	4.46563	0.149	0	12.465	22.307	0.427	0.017	99.4606	1.72097	0.279028	0	0	0.697003	0.140078	0.0922963	0.0552208	0.0810362	0.00130484	0	0.00473373	0.896461	0.031053	0.000813461	2	2	11.9992	0.749967	12.9527	48.9716	38.0757	1.73354	0.062106	0.0810362	0.0437805	0.073175	0
ANK 7-7A-4	Roque del Conde	rim		High T	-0.124226	0.213602	1126.01	12.2941	45.888	2.922	7.652	0.073	2.56779	5.03246	0.106	0	12.461	22.319	0.33	0.007	99.3582	1.723	0.276998	0	0	0.69751	0.158024	0.0725533	0.0616278	0.0825047	0.00216712	0	0.00337115	0.897883	0.024024	0.000335306	2	2	11.9997	0.751556	12.7887	49.0823	38.129	1.75342	0.0480479	0.0825047	0.0514352	0.0605537	0
ANK 7-7A-5	Roque del Conde	rim		High T	0.00335673	0.234724	1089.63	12.7534	45.285	2.722	7.275	0.012	4.12222	3.82675	0.096	0	12.575	21.956	0.459	0	98.329	1.71763	0.282375	0	0	0.711038	0.121384	0.117657	0.0428369	0.077638	0.000359856	0	0.00308412	0.892249	0.0337544	0	2	2	12	0.748399	13.1204	48.3496	38.5301	1.72467	0.0675089	0.077638	0.0339236	0.0931752	0
ANK 7-7B-1	Roque del Conde	rim		High T	0.121025	0.266142	1121.88	12.5761	46.707	2.504	6.587	0.05	2.82203	4.75269	0.1	0	12.871	22.398	0.343	0.006	99.1407	1.75535	0.244654	0	0	0.721114	0.149374	0.0798092	0.0471071	0.0707664	0.00148568	0	0.00318322	0.90188	0.024993	0.000287666	2	2	11.9997	0.75883	12.5241	48.6094	38.8665	1.77237	0.0499861	0.0707664	0.0382751	0.0648461	0
ANK 7-7B-2	Roque del Conde	rim		High T	0.187472	0.252055	1129.88	5.87781	44.931	3.041	7.918	0.025	3.66631	4.31698	0.121	0	12.392	21.832	0.423	0	98.6663	1.6999	0.300099	0	0	0.698923	0.136589	0.10438	0.0529638	0.0865179	0.00074781	0	0.00387747	0.884972	0.0310286	0	2	2	12	0.743621	13.3888	48.3924	38.2188	1.72048	0.0620572	0.0865179	0.0427709	0.0842923	0
ANK 7-7B-3	Roque del Conde	rim		High T	0.00936392	0.283691	1142.63	6.98655	44.764	3.021	8.027	0.12	4.21264	3.71939	0.101	0	12.481	22.163	0.381	0.004	98.994	1.68836	0.311638	0	0	0.701773	0.117318	0.119564	0.0451816	0.0856839	0.00357842	0	0.00322659	0.89562	0.0278616	0.000192466	2	2	11.9998	0.747636	13.0671	48.7412	38.1917	1.71471	0.0557232	0.0856839	0.0384691	0.101801	0
ANK 7-7B-4	Roque del Conde	rim		High T	0.126306	0.331841	1121.86	14.7276	47.428	2.29	6.043	0.07	2.71724	4.50598	0.137	0	13.446	22.226	0.361	0.003	99.2272	1.77602	0.22398	0	0	0.750614	0.14111	0.0765688	0.0427212	0.0644853	0.00207245	0	0.0043453	0.891729	0.0262099	0.000143315	2	2	11.9999	0.775193	11.9088	47.8301	40.2611	1.78345	0.0524197	0.0644853	0.0340256	0.0609837	0
ANK 7-7B-5	Roque del Conde	rim		High T	-0.140117	0.473382	1062.42	17.7735	46.747	2.351	6.474	0.04	4.35674	3.37573	0.117	0	13.22	22.433	0.477	0	99.5915	1.74681	0.253187	0	0	0.736435	0.105491	0.122508	0.0319304	0.0660628	0.00118175	0	0.00370309	0.898129	0.0345585	0	2	2	12	0.763593	12.4153	48.1243	39.4604	1.74006	0.0691171	0.0660628	0.0250297	0.096032	0
ANK 7-7C-1	Roque del Conde	rim		Low T	-0.224509	0.314074	1132.14	19.1412	46.694	2.37	6.467	0.135	3.49855	3.90494	0.101	0	13.291	22.167	0.396	0.01	99.0345	1.75322	0.246781	0	0	0.743949	0.122616	0.0988495	0.0393973	0.0669168	0.00400758	0	0.00321205	0.891745	0.028828	0.000478995	2	2	11.9995	0.770601	12.077	47.9337	39.9893	1.75831	0.057656	0.0669168	0.0321875	0.0807599	0
ANK 7-7C-2	Roque del Conde	rim		Low T	-0.147217	0.463641	1085.41	20.0581	46.105	2.391	6.557	0.067	4.43867	3.19801	0.104	0	13.139	22.235	0.437	0.014	98.6857	1.7388	0.261205	0	0	0.738709	0.100864	0.125969	0.0302458	0.0678097	0.00199779	0	0.00332215	0.898455	0.0319541	0.000673573	2	2	11.9993	0.765072	12.3254	48.1147	39.5599	1.73803	0.0639081	0.0678097	0.0243154	0.10127	0
ANK 7-7C-3	Roque del Conde	rim		Low T	-0.148181	0.386469	1122.08	21.8986	46.545	2.361	6.761	0.136	4.27348	3.48764	0.106	0	13.236	22.408	0.396	0.015	99.7251	1.73763	0.262366	0	0	0.736636	0.108886	0.120054	0.035112	0.0662816	0.00401419	0	0.00335179	0.896287	0.0286632	0.000714386	2	2	11.9993	0.762897	12.4539	48.0527	39.4933	1.74181	0.0573264	0.0662816	0.0293726	0.10043	0
ANK 7-7C-4	Roque del Conde	rim		Low T	-0.157007	0.228986	1124.88	12.3908	46.169	2.592	7.247	0.061	2.97136	4.56032	0.107	0	12.52	22.377	0.404	0.003	99.0117	1.73773	0.262275	0	0	0.702499	0.143543	0.0841583	0.0592009	0.0733631	0.00181524	0	0.00341115	0.902383	0.029482	0.000144048	2	2	11.9999	0.755213	12.5879	49.1496	38.2626	1.74843	0.0589639	0.0733631	0.0477163	0.0678322	0
ANK 7-7C-5	Roque del Conde	rim		Low T	-0.157699	0.300321	1120.69	21.2992	46.549	2.262	6.874	0.166	3.62338	3.67561	0.083	0	13.168	22.429	0.362	0.016	99.208	1.74443	0.255565	0	0	0.735656	0.115194	0.102181	0.0480425	0.0637454	0.00491843	0	0.00263456	0.90056	0.0263025	0.000764928	2	2	11.9992	0.771912	11.8525	48.5157	39.6318	1.75141	0.052605	0.0637454	0.0409591	0.0871153	0
ANK 7-7E-1	Roque del Conde	rim		Low P	-0.224934	0.248525	1141.65	6.21827	44.427	3.318	8.332	0.102	3.27399	4.719	0.087	0	11.97	22.258	0.312	0	98.799	1.68278	0.317216	0	0	0.675906	0.149482	0.0933189	0.0547386	0.0945083	0.00305461	0	0.00279117	0.903288	0.0229129	0	2	2	12	0.735715	13.4587	49.501	37.0403	1.72868	0.0458258	0.0945083	0.0473968	0.0808025	0
ANK 7-7E-2	Roque del Conde	rim		Low P	-0.163	0.262887	1142.36	7.37735	44.588	3.064	8.309	0.151	4.3958	3.63457	0.088	0	12.186	22.529	0.38	0	99.3254	1.67833	0.32167	0	0	0.683804	0.114411	0.124511	0.0469405	0.0867282	0.00449376	0	0.00280562	0.908573	0.0277324	0	2	2	12	0.741069	13.1796	49.5377	37.2827	1.70679	0.0554648	0.0867282	0.0405782	0.107635	0
ANK 7-7E-4	Roque del Conde	rim		Low P	-0.0657569	0.234947	1141.88	7.49279	45.207	2.953	7.909	0.129	3.74704	3.88234	0.078	0	12.419	22.454	0.398	0	99.1764	1.70068	0.299316	0	0	0.69649	0.122143	0.106076	0.0513536	0.0835398	0.00383691	0	0.00248541	0.905045	0.0290299	0	2	2	12	0.753199	12.5914	49.3956	38.0131	1.72368	0.0580598	0.0835398	0.0431357	0.089101	0
ANK 7-7E-5	Roque del Conde	rim		Low P	-0.170048	0.295486	1096.76	16.7282	46.954	2.378	6.446	0.042	3.53283	4.05309	0.125	0	13.264	22.289	0.41	0.001	99.4949	1.75567	0.244334	0	0	0.739357	0.12674	0.0994039	0.0397314	0.0668641	0.00124163	0	0.00395882	0.892932	0.0297233	4.77008e-05	2	2	12	0.765776	12.3552	47.9454	39.6994	1.75903	0.0594467	0.0668641	0.0315846	0.0790213	0
ANK 7-7F-1	Roque del Conde	rim		Low P	-0.171187	0.254024	1133.52	11.9888	45.605	2.84	7.48	0.115	3.50909	4.02946	0.083	0	12.602	22.608	0.333	0	99.2045	1.71475	0.285252	0	0	0.706379	0.126704	0.0992871	0.0462212	0.0803005	0.00341869	0	0.00264333	0.91077	0.024276	0	2	2	12	0.757616	12.3869	49.3433	38.2699	1.74385	0.0485519	0.0803005	0.0395958	0.0850552	0
ANK 7-7F-2	Roque del Conde	rim		Low P	-0.120789	0.224815	1136.73	12.1096	45.83	2.719	7.612	0.127	3.62842	3.90708	0.097	0	12.629	22.569	0.388	0.005	99.5115	1.71659	0.283406	0	0	0.705176	0.122385	0.10227	0.0526225	0.0765842	0.00376093	0	0.00307734	0.905709	0.0281769	0.000238915	2	2	11.9998	0.758392	12.386	49.2604	38.3536	1.73327	0.0563539	0.0765842	0.0442464	0.0859909	0
ANK 7-7F-4	Roque del Conde	rim		Low P	-0.102917	0.257742	1132.93	15.4891	45.68	2.547	7.366	0.152	3.7902	3.67451	0.076	0	12.833	22.36	0.352	0.002	98.8327	1.72119	0.278814	0	0	0.720843	0.115786	0.107467	0.0482949	0.0721677	0.00452813	0	0.0024255	0.902676	0.0257151	9.61364e-05	2	2	11.9999	0.763527	12.2041	48.8145	38.9814	1.73931	0.0514302	0.0721677	0.041696	0.0927827	0
ANK 7-7F-5	Roque del Conde	rim		Low P	-0.180301	0.347109	1120.03	15.2156	45.546	2.665	7.547	0.132	4.40968	3.03509	0.102	0	12.892	22.548	0.392	0.011	99.2798	1.70835	0.291653	0	0	0.72087	0.0952037	0.124464	0.0419719	0.0751683	0.00391447	0	0.0032405	0.906134	0.0285073	0.00052635	2	2	11.9995	0.766445	12.0497	48.9825	38.9678	1.72221	0.0570146	0.0751683	0.0356374	0.105679	0
ANK 5-5C-3	Teno	outer rim			0.287391	0.42141	1121.59	10.2079	48.939	2.117	4.065	0	2.06352	5.9132	0.142	0	13.853	21.558	0.438	0.007	99.0957	1.83726	0.162735	0	0	0.775302	0.18565	0.0582958	0.0171253	0.0597654	0	0	0.00451535	0.867129	0.0318812	0.000335252	2	2	11.9997	0.760661	13.1399	45.8582	41.0019	1.82808	0.0637625	0.0597654	0.00981016	0.0333944	0
ANK 5-5C-4	Teno	outer rim			-0.0991454	0.466112	1130.72	19.1592	47.654	2.241	5.893	0.221	2.98544	3.39364	0.106	0	14.075	22.496	0.342	0	99.4071	1.77512	0.224879	0	0	0.781605	0.105718	0.0836852	0.0338369	0.0627744	0.0065087	0	0.00334442	0.897826	0.0247001	0	2	2	12	0.804941	10.2954	47.9562	41.7484	1.78515	0.0494002	0.0627744	0.0285993	0.0707315	0
ANK 2-2D-10	Teno	outer rim			0.111086	0.289018	1120.24	4.69405	46.479	2.977	6.039	0.019	2.45198	5.54066	0.111	0	12.669	21.74	0.467	0	98.4936	1.76211	0.237888	0	0	0.716027	0.175669	0.0699527	0.0319481	0.0848726	0.000569514	0	0.00356439	0.883069	0.0343272	0	2	2	12	0.744583	13.482	47.7778	38.7401	1.77477	0.0686543	0.0848726	0.0213644	0.0467788	0
ANK 4-4A-11	Teno	outer rim			0.337289	0.298283	1116.76	9.7532	44.408	4.052	7.946	0.001	2.77457	6.88739	0.137	0	10.94	21.568	0.545	0.019	99.278	1.68719	0.312812	0	0	0.619627	0.218833	0.0793247	0.042991	0.115767	3.00383e-05	0	0.00440868	0.877952	0.0401461	0.000920899	2	2	11.9991	0.675133	16.8079	48.7712	34.4209	1.71641	0.0802921	0.115767	0.0285675	0.0527113	0
ANK 1-1B-6	Teno	outer rim			-0.0193846	0.356131	1117.8	7.10867	47.34	2.694	5.047	0	2.4856	5.84441	0.13	0	12.743	21.932	0.483	0	98.699	1.79294	0.207056	0	0	0.719484	0.185112	0.0708403	0.0182287	0.076727	0	0	0.00417031	0.88997	0.0354675	0	2	2	12	0.737602	13.9135	47.6028	38.4838	1.79457	0.0709349	0.076727	0.01097	0.0426316	0
ANK 1-1B-7	Teno	outer rim			0.955836	0.419997	1101.74	8.74275	45.011	2.959	6.277	0.018	6.19596	3.48276	0.158	0	13.583	20.879	0.405	0	98.9687	1.70235	0.279797	0.0178484	0	0.76584	0.110157	0.17634	0	0.0663083	0.000538242	0	0.00506145	0.846057	0.0296982	0	2	2	12	0.727752	15.3173	44.4485	40.2342	1.72205	0.0593965	0.0663083	0	0.14718	0
ANK 1-1D-5	Teno	outer rim			0.734318	0.477868	1124.97	3.50624	47.877	2.587	5.203	0	0.902816	7.05063	0.122	0	12.737	21.681	0.414	0	98.5744	1.8126	0.187398	0	0	0.718875	0.223234	0.0257209	0.0447625	0.0736519	0	0	0.0039122	0.879455	0.0303893	0	2	2	12	0.74277	13.6596	47.5074	38.833	1.82156	0.0607785	0.0736519	0.025463	0.0146312	0
ANK 2-2A-8	Teno	outer rim			0.177882	0.231653	1119.61	5.30827	46.018	2.995	6.138	0.006	3.11309	4.90978	0.146	0	12.69	21.776	0.462	0	98.2539	1.7493	0.250701	0	0	0.719132	0.156083	0.089051	0.0242921	0.0856141	0.000180327	0	0.00470084	0.886897	0.0340504	0	2	2	12	0.745782	13.4619	47.7889	38.7492	1.76211	0.0681008	0.0856141	0.017033	0.0624401	0
ANK 2-2B-8	Teno	outer rim			1.19752	0.752951	1121.85	10.2072	48.486	2.186	4.239	0.045	2.33861	5.37467	0.115	0	14.263	21.354	0.356	0.006	98.7633	1.82358	0.176416	0	0	0.799707	0.169051	0.0661879	0.0114859	0.0618261	0.00133812	0	0.00366347	0.860493	0.0259599	0.000287884	2	2	11.9997	0.772704	12.5798	45.3105	42.1097	1.82925	0.0519199	0.0618261	0.00780242	0.0449617	0
ANK 2-2C-10	Teno	outer rim			0.364139	0.3029	1113.41	9.79409	44.51	3.548	7.2	0.009	4.70482	4.27552	0.119	0	12.28	21.576	0.53	0.009	98.7613	1.68998	0.31002	0	0	0.695077	0.135759	0.134424	0.0121727	0.101302	0.000270172	0	0.00382699	0.877715	0.0390161	0.000435936	2	2	11.9996	0.720093	14.837	47.5262	37.6368	1.70855	0.0780323	0.101302	0.00891923	0.0984959	0
ANK 5-5C-5	Teno	outer rim			-0.139107	0.269184	1117.84	6.22812	46.275	3.006	6.117	0.013	3.07969	5.12884	0.118	0	12.464	21.971	0.519	0.005	98.6965	1.75292	0.247084	0	0	0.703854	0.162476	0.0877876	0.0260102	0.085628	0.000389343	0	0.00378602	0.891709	0.0381177	0.000241625	2	2	11.9998	0.737701	13.7353	48.2106	38.0541	1.75804	0.0762353	0.085628	0.0173316	0.0584963	0
ANK 5-5A-5	Teno	outer rim			-0.130948	0.390881	1115.17	6.64808	47.274	2.906	5.434	0.005	1.70424	6.6585	0.118	0	12.42	21.698	0.521	0.003	98.7417	1.79076	0.20924	0	0	0.70137	0.210934	0.0485798	0.0333613	0.0827795	0.000149747	0	0.00378602	0.88063	0.0382646	0.000144975	2	2	11.9999	0.729921	14.2687	47.7228	38.0085	1.79293	0.0765292	0.0827795	0.0177843	0.025897	0
ANK 5-5D-5	Teno	outer rim			0.1384	0.281867	1118.28	6.27908	46.875	2.805	5.886	0	3.28937	4.88116	0.115	0	13.14	21.942	0.433	0.011	99.3775	1.76011	0.239891	0	0	0.735537	0.153277	0.0929442	0.0205906	0.0792033	0	0	0.00365748	0.88274	0.0315232	0.000526923	2	2	11.9995	0.749204	13.3757	47.252	39.3723	1.77155	0.0630464	0.0792033	0.014778	0.0667066	0
ANK 7-7F-3	Roque del Conde	outer rim			0.17643	0.185581	1118.93	22.3796	42.266	4.765	9.77	0.032	4.08418	5.28098	0.143	0	10.869	21.604	0.496	0.015	99.3252	1.60507	0.394927	0	0	0.615324	0.167716	0.116713	0.04235	0.136075	0.000960787	0	0.00459966	0.879015	0.0365199	0.000726693	2	2	11.9993	0.683881	16.2069	49.2896	34.5035	1.66205	0.0730398	0.136075	0.0326891	0.0900883	0
ANK 7-7D-3	Roque del Conde	outer rim			0.432333	0.462653	1114.59	7.14307	43.966	3.236	7.153	0.138	6.28205	3.8063	0.111	0	12.442	21.568	0.378	0	99.0803	1.6696	0.320143	0.0102534	0	0.704364	0.12088	0.179518	0	0.0821562	0.00414333	0	0.00357031	0.877536	0.0278312	0	2	2	12	0.701025	16.1182	46.5322	37.3496	1.70278	0.0556625	0.0821562	0	0.15583	0
ANK 7-7A-1	Roque del Conde	outer rim			1.22377	0.566708	1128.07	17.4612	49.348	1.948	4.651	0.003	2.26297	5.33174	0.142	0	14.017	22.451	0.325	0.009	100.489	1.82481	0.175185	0	0	0.772707	0.164882	0.0629707	0.0275149	0.0541689	8.7709e-05	0	0.00444758	0.889495	0.0233011	0.000424569	2	2	11.9996	0.772274	12.2618	46.9514	40.7868	1.82708	0.0466022	0.0541689	0.0203271	0.0465205	0
ANK 7-7A-2	Roque del Conde	outer rim			0.231887	0.293809	1108.56	14.4099	47.541	2.23	5.877	0.004	2.92426	4.74269	0.121	0	13.373	22.213	0.358	0.01	99.394	1.77958	0.220425	0	0	0.746255	0.148467	0.0823712	0.0388513	0.0627718	0.000118381	0	0.00383636	0.890869	0.0259822	0.000477534	2	2	11.9995	0.76375	12.5374	47.5943	39.8684	1.78559	0.0519643	0.0627718	0.030409	0.0644722	0
footnote: cpx formula calculated on 4 cations and charge balance; cpx components calculated following Chicchi et al. (2023)
the error associated to each analyses represent 1 sd of M distinct feedforward models employed to train GAIA (see Chicchi et al. 2023 for details).
In contrast, the error bar reported in the text and diagrams is 1 SEE (standard error of the mean): 1 kbar for P and 30°C for T
[truncated: 8 more columns]

## Sheet: Table S5
Supplementary Table S5 - Nimis and Ulmer (1998) geobarometer
Sample	locality	Temp (°C)	P(MA) kbar	Vcell	VM1	VcCor(MA)	VM1Cor(MA)
				[Å3]
ANK 1B CORE	Teno	1127.26	2.44795	438.675	11.7915	454.86	12.2883
ANK 1B RIM	Teno	1110.46	0.547493	440.452	11.7541	456.811	12.2337
ANK 1D CORE	Teno	1119.56	-0.0707415	439.713	11.8132	456.706	12.3199
ANK 1D RIM	Teno	1122.26	-0.805599	441.172	11.7353	457.972	12.2269
ANK 2C CORE	Teno	1082.16	0.98688	440.131	11.807	456.063	12.2906
ANK 3A CORE	Teno	1074.79	5.01314	439.257	11.7096	453.246	12.1499
ANK 3A RIM	Teno	1091.34	0.266082	441.232	11.7493	457.055	12.2085
ANK 3C CORE	Teno	1091.36	3.99072	439.651	11.6887	454.339	12.1404
ANK 5C RIM	Teno	1108.93	0.141925	440.844	11.7437	457.377	12.2254
ANK 7B CORE	Roque del Conde	1156.94	0.446838	439.363	11.7526	456.67	12.2627
ANK 7B RIM	Roque del Conde	1102.05	0.163999	441.157	11.7288	457.43	12.1998
ANK 7D CORE	Roque del Conde	1111.11	2.37907	440.402	11.6503	455.835	12.1045
ANK 7F CORE	Roque del Conde	1067.53	3.57243	440.07	11.7175	454.509	12.1629
ANK 7FRIM	Roque del Conde	1134.83	1.12553	440.987	11.6846	457.05	12.1402
footnote: the value of temperature is from the geothermobarometer GAIA. The 1sd error on pressure is ±2kbar (Nimis and Ulmer, 1998)
VcCor(MA) and VM1Cor(MA) are volume corrected for thermal expansivity

## Sheet: Table S6
Supplementary Table S6 - EMPA analyses of plagioclase
	Teno																																Roque del Conde
	ANK 1-Feldspati-1	ANK 1-Feldspati-2	ANK 1-Feldspati-3	ANK 1-Feldspati-4	ANK 1-Feldspati-5	ANK 4-Feldspati-2	ANK 4-Feldspati-3	ANK 4-Feldspati-4	ANK 4-Feldspati-5	ANK 4-Feldspati-6	ANK 5-Feldspati-1	ANK 5-Feldspati-2	ANK 5-Feldspati-3	ANK 5-Feldspati-4	ANK 5-Feldspati-5	ANK 2-Feldspati 1	ANK 2- Feldspati 2	ANK 2- Feldspati 3	ANK 2- Feldspati 4	ANK 2- Feldspati 6	ANK 2- Feldspati 7	ANK 2- Feldspati 8	ANK 2- Feldspati 9	ANK 2- Feldspati 10	ANK 3- Feldspati 1	ANK 3- Feldspati 2	ANK 3- Feldspati 3	ANK 3- Feldspati 8	ANK 3- Feldspati 9	ANK 3- Feldspati 10	ANK 3- Feldspati 6		ANK 7-Feldspati-1	ANK 7-Feldspati-2	ANK 7-Feldspati-3	ANK 7-Feldspati-4	ANK 7-Feldspati-5	ANK 7-Feldspati-6	ANK 7-Feldspati-7	ANK 7-Feldspati-8	ANK 7-Feldspati-9	ANK 7-Feldspati-10
SiO2(Mass%)	50.522	51.598	50.908	51.558	51.915	50.89	50.634	50.826	50.283	50.435	50.322	51.628	51.32	52.732	51.33	50.723	56.891	50.14	49.538	51.12	54.807	51.352	51.108	50.8	51.045	50.153	50.273	50.347	49.914	50.053	49.995		50.523	50.624	47.538	50.566	49.733	51.516	50.425	50.484	50.496	50.604
TiO2(Mass%)	0.271	0.21	0.23	0.216	0.2	0.21	0.18	0.208	0.226	0.208	0.19	0.197	0.212	0.179	0.253	0.205	0.228	0.194	0.216	0.257	0.257	0.201	0.238	0.19	0.232	0.24	0.224	0.242	0.241	0.214	0.195		0.218	0.23	0.103	0.202	0.203	0.251	0.199	0.206	0.194	0.305
Al2O3(Mass%)	29.947	29.778	29.734	30.134	28.32	31.141	31.193	30.819	30.724	31.141	30.158	30.326	30.628	29.375	29.916	29.781	23.838	30.399	29.837	29.738	26.771	29.875	29.827	30.178	29.934	30.45	30.356	30.458	30.531	30.315	30.722		31.041	30.739	33.461	30.747	31.35	30.074	30.918	31.053	30.801	30.331
FeO(Mass%)	1.342	0.939	1.375	0.972	1.518	0.918	0.937	1.013	0.954	0.891	1.23	0.787	0.828	0.801	0.988	0.885	1.576	1.047	1.31	0.954	0.895	0.936	1.077	0.858	1.085	1.001	0.899	0.995	1.081	0.928	0.934		1.008	1.04	0.5	0.979	1.027	0.938	0.869	0.91	0.95	1.182
MnO(Mass%)	0	0.016	0	0.02	0.002	0	0.013	0	0.002	0.003	0.009	0	0.001	0.01	0.006	0.012	0.033	0.015	0.019	0.01	0.013	0.008	0.014	0	0.011	0.019	0	0.02	0	0.016	0		0.006	0	0.017	0.015	0.016	0.005	0	0.003	0.015	0.004
MgO(Mass%)	0.456	0.122	0.788	0.055	1.456	0.142	0.133	0.15	0.165	0.132	0.691	0.039	0.052	0.091	0.325	0.061	1.254	0.071	0.893	0.086	0.243	0.035	0.06	0.044	0.117	0.135	0.095	0.091	0.128	0.127	0.129		0.13	0.106	0.036	0.12	0.112	0.105	0.128	0.125	0.147	0.192
CaO(Mass%)	12.901	12.254	12.598	12.693	11.18	14.067	14.211	14.081	13.843	13.961	12.784	13.006	13.196	12.247	12.917	12.809	5.949	13.007	12.865	12.672	9.323	12.549	12.594	12.973	13.295	13.615	13.088	12.927	13.443	13.813	13.296		13.838	13.411	16.314	13.48	14.395	12.648	13.899	14.04	13.932	13.368
Na2O(Mass%)	3.635	4.195	3.654	3.992	3.857	3.173	3.067	3.199	3.166	3.076	3.571	3.643	3.549	4.07	3.643	3.781	4.709	3.612	3.462	3.726	4.549	3.913	3.864	3.671	3.256	3.207	3.666	3.867	3.243	3.352	3.412		3.219	3.403	1.854	3.404	3.012	3.647	3.283	3.261	3.124	3.327
K2O(Mass%)	0.226	0.264	0.288	0.256	0.635	0.238	0.246	0.268	0.281	0.239	0.216	0.257	0.234	0.269	0.248	0.222	3.686	0.238	0.215	0.217	1.864	0.225	0.251	0.227	0.277	0.243	0.276	0.257	0.259	0.246	0.266		0.287	0.309	0.11	0.304	0.252	0.446	0.232	0.268	0.27	0.362
SrO(Mass%)	0.23	0.209	0.182	0.227	0.161	0.305	0.213	0.258	0.244	0.181	0.134	0.18	0.17	0.146	0.174	0.23	0.188	0.228	0.225	0.144	0.209	0.204	0.274	0.204	0.265	0.218	0.241	0.249	0.267	0.263	0.212		0.232	0.267	0.218	0.274	0.303	0.264	0.207	0.257	0.206	0.284
BaO(Mass%)	0.067	0.07	0.082	0.082	0.062	0.098	0.082	0.09	0.094	0.062	0.037	0.079	0.06	0.07	0.057	0.088	0.161	0.082	0.073	0.077	0.177	0.062	0.09	0.07	0.089	0.087	0.105	0.096	0.07	0.068	0.108		0.087	0.061	0.074	0.077	0.077	0.075	0.081	0.096	0.08	0.09
Total(Mass%)	99.597	99.655	99.839	100.205	99.306	101.182	100.909	100.912	99.982	100.329	99.342	100.142	100.25	99.99	99.857	98.797	98.513	99.033	98.653	99.001	99.108	99.36	99.397	99.215	99.606	99.368	99.223	99.549	99.177	99.395	99.269		100.589	100.19	100.225	100.168	100.48	99.969	100.241	100.703	100.215	100.049
Chemical formula calculated on the basis of 8 oxigens
Site occupancy
Si	2.32491	2.37443	2.34268	2.37259	2.38902	2.34185	2.33007	2.3389	2.31391	2.32091	2.31571	2.37581	2.36164	2.42661	2.3621	2.33416	2.618	2.30733	2.27963	2.35243	2.5221	2.36311	2.35188	2.33771	2.34898	2.30793	2.31345	2.31686	2.29693	2.30333	2.30066		2.32496	2.32961	2.1876	2.32694	2.2886	2.37065	2.32045	2.32316	2.32372	2.32869
Ti	0.00339179	0.00262832	0.00287864	0.00270342	0.00250317	0.00262832	0.00225285	0.00260329	0.00282858	0.00260329	0.00237801	0.00246562	0.00265336	0.00224033	0.00316651	0.00256575	0.00285361	0.00242807	0.00270342	0.00321657	0.00321657	0.00251568	0.00297877	0.00237801	0.00290367	0.0030038	0.00280355	0.00302883	0.00301632	0.00267839	0.00244059		0.00272845	0.00287864	0.00128913	0.0025282	0.00254071	0.00314147	0.00249065	0.00257826	0.00242807	0.00381733
Al	1.62418	1.61502	1.61263	1.63433	1.53594	1.68894	1.69176	1.67148	1.66632	1.68894	1.63563	1.64474	1.66112	1.59316	1.6225	1.61518	1.29286	1.6487	1.61822	1.61285	1.45193	1.62028	1.61768	1.63671	1.62348	1.65146	1.64637	1.6519	1.65586	1.64414	1.66622		1.68352	1.66714	1.81477	1.66757	1.70028	1.63107	1.67685	1.68417	1.6705	1.64501
Fe	0.0475114	0.00792546	0.0418138		0.058419				0.0169321		0.0462851				0.0122356	0.0340585	0.0606511	0.0415396	0.0994472	0.0315031	0.0227515	0.0140977	0.0274662	0.0232039	0.0246373	0.0375996	0.0373759	0.0282133	0.0441923	0.0498486	0.0306817			0.000376405	-0.00365148	0.002962	0.00857847	-0.00486787	0.000213829		0.00335467	0.0224861
Tot Z	4	4	4	4.00962	3.98588	4.03342	4.02408	4.01298	4	4.01245	4	4.02301	4.02541	4.02201	4	3.98597	3.97437	4	4	4	4	4	4	4	4	4	4	4	4	4	4		4.0112	4	4	4	4	4	4	4.00991	4	4
Fe2+	0.00413434	0.0282112	0.0111019	0.0374066		0.0353285	0.0360597	0.0389845	0.0197818	0.0342894	0.00105041	0.030287	0.0318649	0.0308258	0.0257868					0.00521075	0.0116919	0.0219235	0.0139812	0.00981553	0.0171181	0.000923015	-0.0027786	0.0100785			0.00526254		0.038792	0.0396471	0.0228936	0.034714	0.0309448	0.040966	0.0332289	0.0350206	0.0332053	0.0230022
Mn	0	0.000623637	0	0.000779546	7.79546e-05	0	0.000506705	0	7.79546e-05	0.000116932	0.000350796	0	3.89773e-05	0.000389773	0.000233864	0.000467728	0.00128625	0.00058466	0.000740569	0.000389773	0.000506705	0.000311819	0.000545682	0	0.00042875	0.000740569	0	0.000779546	0	0.000623637	0		0.000233864	0	0.000662614	0.00058466	0.000623637	0.000194887	0	0.000116932	0.00058466	0.000155909
Mg	0.0312824	0.0083694	0.0540581	0.00377309	0.099884	0.00974144	0.00912402	0.0102903	0.0113193	0.00905542	0.0474038	0.00267547	0.00356729	0.00624275	0.0222955	0.0041847	0.0860265	0.00487072	0.0612613	0.00589974	0.0166702	0.00240106	0.0041161	0.00301847	0.0080264	0.00926123	0.00651716	0.00624275	0.00878101	0.00871241	0.00884962		0.00891822	0.00727178	0.00246966	0.0082322	0.00768339	0.00720318	0.00878101	0.00857521	0.0100844	0.0131715
Ca	0.636073	0.604174	0.621134	0.625818	0.551221	0.693562	0.700662	0.694252	0.682518	0.688336	0.630305	0.64125	0.650618	0.603828	0.636862	0.631537	0.293311	0.6413	0.634298	0.624783	0.459663	0.618718	0.620937	0.639623	0.655499	0.671277	0.645293	0.637355	0.662796	0.681039	0.655548		0.682271	0.661218	0.804349	0.66462	0.709734	0.623599	0.685279	0.692231	0.686906	0.659098
Na	0.324323	0.374287	0.326018	0.356175	0.34413	0.283102	0.273645	0.285422	0.282478	0.274448	0.318613	0.325037	0.31665	0.363134	0.325037	0.337349	0.420147	0.322271	0.308887	0.332442	0.405872	0.349127	0.344755	0.327535	0.290508	0.286136	0.327089	0.345022	0.289348	0.299073	0.304426		0.287206	0.303623	0.165418	0.303712	0.268737	0.325393	0.292917	0.290954	0.27873	0.296842
K	0.0132676	0.0154985	0.0169074	0.0150288	0.0372785	0.0139721	0.0144417	0.0157333	0.0164965	0.0140308	0.0126806	0.0150875	0.0137373	0.015792	0.0145592	0.0130328	0.216391	0.0139721	0.0126219	0.0127393	0.109429	0.0132089	0.0147353	0.0133263	0.0162616	0.0142656	0.0162029	0.0150875	0.0152049	0.0144417	0.0156159		0.0168487	0.0181402	0.00645769	0.0178467	0.014794	0.026183	0.0136199	0.0157333	0.0158507	0.0212517
Sr	0.0122746	0.0111538	0.00971291	0.0121144	0.00859219	0.0162771	0.0113673	0.0137688	0.0130217	0.00965954	0.00715126	0.00960617	0.00907249	0.00779167	0.00928596	0.0122746	0.0100331	0.0121678	0.0120077	0.00768494	0.0111538	0.010887	0.0146227	0.010887	0.0141424	0.0116341	0.0128616	0.0132885	0.0142492	0.0140357	0.0113139		0.0123813	0.0142492	0.0116341	0.0146227	0.0161704	0.014089	0.0110471	0.0137155	0.0109937	0.0151564
Ba	0.0012082	0.0012623	0.00147869	0.00147869	0.00111803	0.00176721	0.00147869	0.00162295	0.00169508	0.00111803	0.000667213	0.00142459	0.00108197	0.0012623	0.00102787	0.00158689	0.00290328	0.00147869	0.00131639	0.00138852	0.0031918	0.00111803	0.00162295	0.0012623	0.00160492	0.00156885	0.00189344	0.00173115	0.0012623	0.00122623	0.00194754		0.00156885	0.0011	0.00133443	0.00138852	0.00138852	0.00135246	0.00146066	0.00173115	0.00144262	0.00162295
Tot	1.02256	1.04358	1.04041	1.05257	1.0423	1.05375	1.04728	1.06007	1.02739	1.03105	1.01822	1.02537	1.02663	1.02927	1.03509	1.00043	1.0301	0.995398	1.03113	0.990538	1.01818	1.0177	1.01532	1.00547	1.00359	0.995806	1.00708	1.02959	0.98905	1.01915	1.00296		1.04822	1.04525	1.01522	1.04572	1.05008	1.03898	1.04633	1.05808	1.0378	1.0303
An(mol%)	65.3278	60.7845	64.429	62.7687	59.1039	70.0118	70.8635	69.7455	69.5388	70.4674	65.5476	65.3421	66.3216	61.4424	65.2217	64.3166	31.5439	65.6033	66.3626	64.413	47.1467	63.0667	63.3333	65.2354	68.1202	69.0843	65.2744	63.8975	68.5168	68.4768	67.195		69.173	67.2666	82.3938	67.3934	71.4546	63.9474	69.0934	69.2981	69.9863	67.4482
Ab(mol%)	33.3095	37.6562	33.8172	35.7239	36.8989	28.5778	27.6759	28.6739	28.7804	28.0962	33.1337	33.1205	32.2781	36.9507	33.2873	34.3561	45.1845	32.9674	32.3169	34.2736	41.6294	35.5869	35.1637	33.4054	30.1899	29.4476	33.0866	34.5899	29.9114	30.0711	31.2043		29.1188	30.888	16.9447	30.7969	27.056	33.3677	29.5334	29.1269	28.3988	30.3771
Or(mol%)	1.36265	1.55927	1.75377	1.50737	3.99714	1.41042	1.46061	1.58059	1.68075	1.43638	1.3187	1.53739	1.40033	1.60691	1.49102	1.32728	23.2717	1.42931	1.32054	1.31338	11.2239	1.3464	1.50295	1.35916	1.68993	1.46814	1.639	1.51259	1.57181	1.45208	1.60066		1.70823	1.84543	0.661497	1.80968	1.48943	2.68495	1.37323	1.57503	1.61497	2.17477

## Sheet: Table S7
Supplementary Table S7 - EMPA analyses of olivine
	Teno																																							Roque del Conde
	ANK 1-Olivine-1	ANK 1-Olivine-2	ANK 1-Olivine-3	ANK 1-Olivine-4	ANK 1-Olivine-5	ANK 1-Olivine-6	ANK 1-Olivine-7	ANK 1-Olivine-8	ANK 1-Olivine-9	ANK 4-Olivine-1	ANK 4-Olivine-2	ANK 4-Olivine-3	ANK 4-Olivine-4	ANK 4-Olivine-5	ANK 4-Olivine-6	ANK 4-Olivine-7	ANK 4-Olivine-8	ANK 4-Olivine-9	ANK 5-Olivine-1	ANK 5-Olivine-2	ANK 5-Olivine-3	ANK 5-Olivine-8	ANK 5-Olivine-9	ANK 2-Olivine 1	ANK 2-Olivine 3	ANK 2-Olivine 4	ANK 2-Olivine 5	ANK 2-Olivine 6	ANK 2-Olivine 7	ANK 2-Olivine 8	ANK 2-Olivine 9	ANK 2-Olivine 10	ANK 3-Olivine 1	ANK 3-Olivine 2	ANK 3-Olivine 3	ANK 3-Olivine 4	ANK 3-Olivine 5	ANK 3-Olivine 6		ANK 7-Olivine-1	ANK 7-Olivine-2	ANK 7-Olivine-3	ANK 7-Olivine-4	ANK 7-Olivine-5	ANK 7-Olivine-7	ANK 7-Olivine-8	ANK 7-Olivine-9	ANK 7-Olivine-10	ANK 7-Olivine-11
SiO2(Mass%)	39.603	39.568	38.736	39.584	39.047	38.224	38.838	39.325	39.019	39.62	39.603	40.445	40.057	39.926	38.976	39.362	39.294	39.956	39.564	39.669	38.195	39.484	36.969	39.356	38.451	38.49	38.804	37.337	37.684	38.634	38.889	37.077	38.877	38.817	37.682	39.35	39.083	38.718		39.778	39.81	37.345	39.63	39.783	39.566	39.749	37.691	39.167	39.283
TiO2(Mass%)	0.043	0.052	0.052	0.044	0.059	0.076	0.051	0.052	0.066	0.047	0.056	0.081	0.058	0.043	0.069	0.062	0.053	0.048	0.04	0.03	0.058	0.04	0.097	0.039	0.043	0.049	0.054	0.061	0.061	0.049	0.046	0.073	0.046	0.068	0.075	0.042	0.035	0.057		0.044	0.037	0.124	0.056	0.06	0.061	0.058	0.094	0.057	0.041
Al2O3(Mass%)	0.047	0.032	0.03	0.031	0.035	0.036	0.041	0.038	0.029	0.038	0.047	0.041	0.044	0.051	0.039	0.058	0.046	0.036	0.028	0.031	0.031	0.036	0.026	0.037	0.04	0.039	0.025	0.036	0.032	0.036	0.03	0.032	0.05	0.051	0.034	0.039	0.037	0.035		0.049	0.043	0.086	0.048	0.054	0.046	0.043	0.038	0.038	0.031
Cr2O3(Mass%)	0.024	0.061	0.02	0.027	0.023	0	0.005	0	0	0.03	0	0.065	0.01	0.015	0.013	0	0.033	0.015	0	0.032	0.013	0	0	0.008	0	0	0	0	0	0	0	0	0.023	0	0.05	0.015	0.002	0.013		0	0.04	0	0	0.017	0.013	0.002	0	0.012	0
FeO(Mass%)	14.508	14.55	17.92	14.765	16.749	18.581	17.963	17.458	18.029	17.737	17.785	17.597	16.242	16.458	19.142	17.552	17.361	16.692	15.994	16.708	23.473	17.526	31.051	15.359	18.279	18.321	17.151	23.886	24.017	17.085	17.41	20.902	18.362	17.841	17.759	16.073	16.455	16.268		15.987	16.273	26.71	15.807	15.915	15.714	15.778	24.593	18.054	16.052
MnO(Mass%)	0.176	0.211	0.255	0.197	0.249	0.24	0.258	0.24	0.241	0.246	0.216	0.244	0.222	0.228	0.29	0.217	0.225	0.229	0.198	0.213	0.357	0.246	0.543	0.218	0.242	0.287	0.253	0.382	0.368	0.26	0.265	0.299	0.204	0.247	0.235	0.221	0.211	0.207		0.215	0.235	0.498	0.199	0.213	0.232	0.212	0.462	0.233	0.238
NiO(Mass%)	0.22	0.187	0.136	0.219	0.171	0.133	0.144	0.126	0.141	0.125	0.172	0.121	0.178	0.177	0.124	0.164	0.179	0.177	0.177	0.177	0.104	0.144	0.052	0.22	0.129	0.108	0.136	0.123	0.102	0.15	0.161	0.143	0.152	0.149	0.135	0.13	0.152	0.13		0.171	0.15	0.07	0.171	0.158	0.157	0.175	0.086	0.135	0.137
MgO(Mass%)	44.789	45.254	42.338	45.081	43.529	42.083	42.236	40.718	42.434	42.204	41.961	40.892	43.171	43.42	40.957	42.122	42.377	43.083	43.708	43.351	37.007	42.499	31.202	44.311	42.233	42.098	43.068	37.091	37.773	42.566	43.08	41.686	42.595	42.035	42.23	43.802	44.11	44.238		43.53	43.779	34.495	44.36	44.118	44.028	44.075	36.319	41.717	43.127
CaO(Mass%)	0.363	0.36	0.44	0.378	0.383	0.407	0.385	0.447	0.409	0.304	0.293	0.387	0.301	0.299	0.387	0.306	0.287	0.331	0.39	0.385	0.42	0.367	0.478	0.322	0.39	0.378	0.379	0.505	0.505	0.364	0.369	0.404	0.299	0.303	0.328	0.307	0.344	0.356		0.303	0.289	0.577	0.305	0.296	0.28	0.285	0.446	0.287	0.341
ZnO(Mass%)	0	0.012	0.024	0	0.05	0	0.03	0.059	0.01	0.011	0.056	0	0.008	0.051	0	0.047	0	0.023	0.007	0.014	0.04	0.065	0.025																	0.008	0	0.017	0.018	0.012	0.002	0.04	0.033	0.014	0
Total(Mass%)	99.773	100.287	99.951	100.326	100.295	99.78	99.951	98.463	100.378	100.362	100.189	99.873	100.291	100.668	99.997	99.89	99.855	100.59	100.106	100.61	99.698	100.407	100.443	99.87	99.807	99.77	99.87	99.421	100.542	99.144	100.25	100.616	100.608	99.511	98.528	99.979	100.429	100.022		100.085	100.656	99.922	100.594	100.626	100.099	100.417	99.762	99.714	99.25
Chemical formula calculated on the basis of 4 oxigens
Si	0.996301	0.99107	0.989779	0.991942	0.988742	0.982323	0.992116	1.01534	0.992292	1.00427	1.00593	1.0268	1.00841	1.0031	0.999603	1.0024	1.00033	1.00544	0.998429	0.99909	1.00373	1.00042	1.00157	0.993498	0.985859	0.987317	0.988569	0.988649	0.986188	0.991376	0.988086	0.958397	0.98792	0.994894	0.978358	0.994874	0.986478	0.981359		1.00309	0.999612	0.996539	0.994323	0.997789	0.997116	0.998596	0.996699	1.00163	1.00036
Ti	0.000813473	0.000979435	0.000999169	0.000829147	0.00112346	0.00146874	0.000979688	0.00100962	0.00126217	0.000895873	0.00106965	0.00154639	0.00109799	0.000812395	0.00133074	0.00118732	0.00101463	0.000908293	0.000759083	0.000568181	0.00114617	0.000762135	0.00197618	0.000740343	0.000829063	0.000945185	0.00103451	0.00121463	0.00120045	0.000945533	0.000878896	0.00141898	0.00087902	0.00131062	0.00146432	0.000798518	0.000664323	0.00108643		0.000834375	0.000698639	0.00248826	0.00105658	0.00113163	0.00115602	0.00109573	0.00186924	0.00109616	0.000785137
Al	0.00139354	0.000944646	0.000903449	0.000915561	0.00104453	0.00109038	0.00123438	0.00115634	0.000869201	0.00113522	0.00140701	0.00122678	0.00130548	0.00151014	0.00117884	0.00174081	0.00138018	0.00106766	0.000832788	0.000920182	0.000960133	0.00107503	0.000830184	0.00110082	0.00120872	0.00117905	0.000750636	0.00112348	0.000986988	0.00108876	0.000898355	0.000974877	0.00149747	0.00154058	0.0010404	0.00116211	0.00110068	0.00104554		0.0014563	0.00127253	0.0027047	0.0014194	0.00159622	0.00136628	0.00127318	0.00118432	0.00114532	0.000930402
Cr	0.000477362	0.00120799	0.000404043	0.000534939	0.000460466	0	0.000100983	0	0	0.000601218	0	0.0013047	0.000199037	0.000297956	0.000263601	0	0.000664212	0.000298427	0	0.000637202	0.000270102	0	0	0.000159669	0	0	0	0	0	0	0	0	0.000462094	0	0.00102638	0.000299839	3.9912e-05	0.000260515		0	0.000794096	0	0	0.000337104	0.000259024	3.97253e-05	0	0.000242628	0
Fe2+	0.305229	0.304775	0.382929	0.309426	0.354683	0.39934	0.383743	0.376958	0.383434	0.375987	0.377791	0.373609	0.341944	0.345796	0.410558	0.373807	0.369615	0.351267	0.337544	0.351912	0.515864	0.371363	0.703515	0.324247	0.391936	0.39302	0.365406	0.528935	0.525627	0.36664	0.369933	0.45184	0.390216	0.382411	0.385602	0.339842	0.347339	0.34483		0.337147	0.341714	0.596063	0.331672	0.333813	0.331182	0.331491	0.543869	0.386113	0.34185
Mn	0.00375026	0.0044764	0.00551886	0.00418137	0.00534049	0.00522415	0.00558228	0.00524855	0.00519118	0.00528151	0.00464709	0.00524685	0.00473367	0.00485185	0.00629962	0.00468069	0.00485163	0.00488084	0.00423222	0.0045438	0.0079463	0.00527936	0.0124603	0.00466121	0.00525543	0.00623558	0.0054593	0.00856746	0.00815711	0.00565104	0.00570295	0.00654633	0.00439081	0.00536214	0.00516795	0.00473262	0.00451095	0.00444397		0.0045922	0.00499796	0.0112558	0.00422905	0.00452488	0.00495219	0.00451113	0.0103479	0.00504693	0.00513349
Ni	0.00445173	0.00376744	0.00279516	0.00441423	0.00348286	0.00274925	0.00295878		0.00288421	0.00254854	0.0035141		0.00360432	0.00357688	0.00255797	0.00335933	0.00366536	0.00358253	0.00359281	0.00358567	0.00219831	0.00293472	0.00113315	0.00446707	0.00266036	0.00222832	0.00278685	0.0026197	0.00214707	0.00309602	0.00329032	0.00297318	0.00310682	0.00307174	0.0028193	0.00264369	0.00308594	0.00265035		0.00346846	0.00302953	0.00150246	0.00345099	0.00318744	0.00318249	0.00353627	0.00182923	0.00277692	0.00280617
Mg	1.67975	1.68977	1.61274	1.68411	1.64318	1.61226	1.60842	1.56725	1.60875	1.59478	1.58891	1.54765	1.62018	1.62625	1.56592	1.59913	1.60827	1.61618	1.64433	1.62766	1.44979	1.60527	1.26019	1.66755	1.61425	1.60983	1.63567	1.46414	1.47365	1.62833	1.63175	1.60636	1.61361	1.60611	1.63454	1.65093	1.65977	1.67156		1.63642	1.63876	1.37224	1.65923	1.64956	1.6541	1.65069	1.43176	1.59041	1.63723
Ca	0.00978425	0.00966098	0.0120458	0.0101489	0.0103909	0.0112065	0.0105372		0.0111441	0.00825599	0.00797384		0.00811866	0.00804853	0.0106341	0.00834919	0.00782816	0.008924	0.0105448	0.010389	0.0118255	0.00996287	0.0138748	0.00870905	0.0107135	0.0103887	0.0103449	0.0143269	0.0141597	0.0100076	0.0100451	0.0111887	0.00814064	0.00832063	0.00912424	0.00831611	0.00930286	0.00966771		0.00818649	0.00777492	0.0164967	0.00819902	0.0079541	0.00756032	0.00767127	0.0126363	0.00786368	0.00930385
Zn	0	0.000221913	0.000452768	0	0.000934774	0	0.000565807	0.0011247	0.000187761	0.000205859	0.0010502	0	0.000148693	0.000946016	0	0.000883697	0	0.000427309	0.000130424	0.000260329	0.00077609	0.00121595	0.000500061	0	0	0	0	0	0	0	0	0	0	0	0	0	0	0		0.000148946	0	0.000334928	0.00033344	0.00022221	3.7213e-05	0.000741933	0.00064429	0.000264335	0
Sum	3.00195	3.00687	3.00857	3.0065	3.00938	3.01566	3.00624	2.96809	3.00601	2.99396	2.99229	2.95739	2.98974	2.99519	2.99834	2.99554	2.99763	2.99297	3.0004	2.99956	2.99451	2.99828	2.99604	3.00513	3.01271	3.01115	3.01002	3.00957	3.01212	3.00713	3.01059	3.0397	3.01022	3.00303	3.01914	3.0036	3.01229	3.0169		2.99535	2.99866	2.99962	3.00391	3.00011	3.00092	2.99965	3.00084	2.99658	2.99839
Mg#	84.4635	84.5299	80.5892	84.3017	82.0276	79.9405	80.5117	80.3942	80.5432	80.7055	80.6001	80.3345	82.374	82.2627	78.9761	80.8614	81.1137	81.9428	82.7916	82.0345	73.4591	80.996	63.7694	83.5254	80.2533	80.1275	81.5171	73.1469	73.4097	81.3912	81.2873	77.7993	80.3504	80.5519	80.7057	82.7325	82.5091	82.7163		82.7244	82.5376	69.3204	83.1639	82.9801	83.1109	83.0874	72.0935	80.2601	82.5128
footnote – Mg# = 100*Mg/(Mg + Fe2+ + Mn) a.p.f.u
[truncated: 4 more columns]
