# Supplementary material for: Ankaramite from Tenerife: a novel geothermobarometric approach to gain insights into the depth of a magma plumbing system
Source: Copernicus journal article supplement (doi:10.5194/ejm-37-747-2025), 2025-10-17
Supplement: Supplementary file [file ejm-37-747-2025-supplement-title-page.pdf › ejm-37-747-2025-supplement-title-page.pdf]

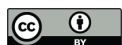

## *Supplement of*

# **Ankaramite from Tenerife: a novel geothermobarometric approach to gain insights into the depth of a magma plumbing system**

**Lorenzo Barni et al.**

*Correspondence to:* Luca Bindi ([luca.bindi@unifi.it](mailto:luca.bindi@unifi.it))

- [ejm-37-747-2025-supplement-title-page.pdf](#)
- [ejm-2025-4-Supplementary Figures.pdf](#)
- [ejm-2025-4-Supplementary Tables.xlsx](#)

The copyright of individual parts of the supplement might differ from the article licence.
